# Supplementary material for: Drivers and mediators of healthcare workers’ anxiety in one of the most affected hospitals by COVID-19: a qualitative analysis
Source: PubMed Central journal article supplement — BMJ Open. 2021 Mar 5;11(3):e045048. doi: 10.1136/bmjopen-2020-045048 (PMC7938469; doi:10.1136/bmjopen-2020-045048), 2021-03-05
Supplement: bmjopen-2020-045048.draft_revisions.pdf [file bmjopen-2020-045048.draft_revisions.pdf]

# BMJ Open

BMJ Open is committed to open peer review. As part of this commitment we make the peer review history of every article we publish publicly available.

When an article is published we post the peer reviewers' comments and the authors' responses online. We also post the versions of the paper that were used during peer review. These are the versions that the peer review comments apply to.

The versions of the paper that follow are the versions that were submitted during the peer review process. They are not the versions of record or the final published versions. They should not be cited or distributed as the published version of this manuscript.

BMJ Open is an open access journal and the full, final, typeset and author-corrected version of record of the manuscript is available on our site with no access controls, subscription charges or pay-per-view fees (<http://bmjopen.bmj.com>).

If you have any questions on BMJ Open's open peer review process please email [info.bmjopen@bmj.com](mailto:info.bmjopen@bmj.com)

# BMJ Open

## Drivers and mediators of healthcare workers' anxiety in one of the most affected hospitals by COVID-19: a qualitative analysis.

|                               |                                                                                                                                                                                                                                                                                                                                                                                                                                                                                                                                                                                                                                          |
|-------------------------------|------------------------------------------------------------------------------------------------------------------------------------------------------------------------------------------------------------------------------------------------------------------------------------------------------------------------------------------------------------------------------------------------------------------------------------------------------------------------------------------------------------------------------------------------------------------------------------------------------------------------------------------|
| Journal:                      | <i>BMJ Open</i>                                                                                                                                                                                                                                                                                                                                                                                                                                                                                                                                                                                                                          |
| Manuscript ID                 | bmjopen-2020-045048                                                                                                                                                                                                                                                                                                                                                                                                                                                                                                                                                                                                                      |
| Article Type:                 | Original research                                                                                                                                                                                                                                                                                                                                                                                                                                                                                                                                                                                                                        |
| Date Submitted by the Author: | 24-Sep-2020                                                                                                                                                                                                                                                                                                                                                                                                                                                                                                                                                                                                                              |
| Complete List of Authors:     | Fang, Mengling; The Central Hospital of Wuhan, Tongji Medical College, Huazhong University of Science and Technology, Department of Digestion<br>Xia, Bo; The Central Hospital of Wuhan, Tongji Medical College, Huazhong University of Science and Technology, Operating Room<br>Tian, Tian; The Central Hospital of Wuhan, Tongji Medical College, Huazhong University of Science and Technology, Department of Digestion<br>Hao, Yan; The Central Hospital of Wuhan, Tongji Medical College, Huazhong University of Science and Technology, Department of Digestion<br>Wu, Zhenghao; Wuhan Union Hospital, Breast and Thyroid Surgery |
| Keywords:                     | COVID-19, MENTAL HEALTH, Quality in health care < HEALTH SERVICES ADMINISTRATION & MANAGEMENT, QUALITATIVE RESEARCH                                                                                                                                                                                                                                                                                                                                                                                                                                                                                                                      |
|                               |                                                                                                                                                                                                                                                                                                                                                                                                                                                                                                                                                                                                                                          |

SCHOLARONE™  
Manuscripts

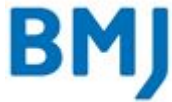

I, the Submitting Author has the right to grant and does grant on behalf of all authors of the Work (as defined in the below author licence), an exclusive licence and/or a non-exclusive licence for contributions from authors who are: i) UK Crown employees; ii) where BMJ has agreed a CC-BY licence shall apply, and/or iii) in accordance with the terms applicable for US Federal Government officers or employees acting as part of their official duties; on a worldwide, perpetual, irrevocable, royalty-free basis to BMJ Publishing Group Ltd ("BMJ") its licensees and where the relevant Journal is co-owned by BMJ to the co-owners of the Journal, to publish the Work in this journal and any other BMJ products and to exploit all rights, as set out in our [licence](#).

The Submitting Author accepts and understands that any supply made under these terms is made by BMJ to the Submitting Author unless you are acting as an employee on behalf of your employer or a postgraduate student of an affiliated institution which is paying any applicable article publishing charge ("APC") for Open Access articles. Where the Submitting Author wishes to make the Work available on an Open Access basis (and intends to pay the relevant APC), the terms of reuse of such Open Access shall be governed by a Creative Commons licence – details of these licences and which [Creative Commons](#) licence will apply to this Work are set out in our licence referred to above.

Other than as permitted in any relevant BMJ Author's Self Archiving Policies, I confirm this Work has not been accepted for publication elsewhere, is not being considered for publication elsewhere and does not duplicate material already published. I confirm all authors consent to publication of this Work and authorise the granting of this licence.

1  
2  
3  
4  
5 **Drivers and mediators of healthcare workers' anxiety in one of**  
6 **the most affected hospitals by COVID-19: a qualitative analysis.**  
7  
8  
9

10  
11 **Mengling Fang** <sup>b,1</sup>, **Bo Xia** <sup>c,1</sup>, **Tian Tian** <sup>b,1</sup>, **Yan Hao** <sup>b</sup>, **Zhenghao Wu** <sup>a,\*</sup>

12  
13 <sup>a</sup>: Department of Breast and Thyroid Surgery, Union Hospital, Tongji Medical  
14 College, Huazhong University of Science and Technology, Wuhan, China.

15  
16 <sup>b</sup>: Department of Digestion, The Central Hospital of Wuhan, Tongji Medical College,  
17 Huazhong University of Science and Technology, Wuhan, China.

18  
19 <sup>c</sup>: Operating Room, The Central Hospital of Wuhan, Tongji Medical College,  
20 Huazhong University of Science and Technology, Wuhan, China.

21  
22  
23 <sup>1</sup>: Mengling Fang, Bo Xia, and Tian Tian are joint first authors  
24  
25

26  
27 **\*: Corresponding Authors:**

28  
29 Zhenghao Wu (421910799@qq.com)

30  
31 Department of Breast and Thyroid Surgery, Union Hospital Affiliated to Tongji  
32 Medical College, Huazhong University of Science and Technology, 1277 Jiefang  
33 Avenue, Wuhan, Hubei, 430022  
34  
35

36  
37 Word count: 3256  
38  
39  
40  
41  
42  
43  
44  
45  
46  
47  
48  
49  
50  
51  
52  
53  
54  
55  
56  
57  
58  
59  
60

## Abstract

**Objectives:** To report healthcare workers' anxiety and explore related drive and mediate factors during COVID-19 pandemics.

**Design:** Semistructured interview study

**Setting:** The Central Hospital of Wuhan, Tongji Medical College, Huazhong University of Science and Technology, Wuhan, China.

**Participants:** 53 healthcare workers who were or were not diagnosed as COVID-19.

**Results:** During COVID-19 epidemics, healthcare workers did not have sufficient psychological preparation initially, and then suffered from severe anxiety and apprehension in the peak stage, no matter whether infected by SARS-CoV-2. These negative emotions were exacerbated by four drivers, including infection risk, supplies, isolations, and media. As the epidemic was gradually under control, healthcare workers experienced less anxiety from the factors above but became concerned about low financial status. In order to reduce anxiety, healthcare workers distracted attention from dangers through personal entertainment and religious belief and concentrated on treatments for patients. Furthermore, assistance from other people, including colleagues, families, friends, patients, and society, defended healthcare workers from anxiety.

**Conclusions:** Personal and social supports can relieve healthcare workers' anxiety to some extent during different stages of epidemics. Both protective equipment and financial allowance benefit healthcare workers to focus on patients' care, although the latter matters most as the epidemic is under control.

## Strengths and limitations of this study

- To our knowledge, this study is the first qualitative study to examine healthcare workers' mental health, also the first studies focusing on drivers and mediators of healthcare workers' anxiety during COVID-19 epidemics to date.
- This research population came from a particular hospital, where the COVID-19 epidemics firstly broke out, and six healthcare workers here passed away due to infection by COVID-19. The staff here underwent tremendous pressure from multiple factors, so they represent most healthcare workers worldwide who are under severe psychological stress during epidemics.
- All participants were voluntary to take part in the research. Although we randomly sampled healthcare workers and successfully invited most of them to interview, some personnel suffered severely would be less inclined to participate.
- Due to social distance and city lockdown, many participants could not be directly interviewed through a face-to-face way, which is less convenient to convey emotions. To catch participants' faces and actions, video calls and online conference app were recommended if permitted by interviewees.

## Introduction

The coronavirus disease 2019 (COVID-19) epidemic is a global health threat and is by far the most massive pandemic since the severe acute respiratory syndrome (SARS) in 2003. The outbreak was first identified in Wuhan, China, in December 2019, with early cases reported here [1]. Until August 2020, the total number of cases exceeded 20 million, and the number of deaths exceeded 800 thousand in the world [2].

Central Hospital in Wuhan (CHW) played a significant role in defending the Wuhan people from the COVID-19 invasion and sacrificed tremendously during the epidemic's outbreak (Figure 1). Cases in the initial cluster were associated with a seafood market in Wuhan and received treatment in the houhu district of the Central Hospital in Wuhan (CHW) nearby [3]. Before the new coronavirus was discovered, healthcare workers in CHW were fully exposed to infected patients without enough cognition and sufficient personal protective equipment (PPE). On 30th Dec 2019, a patient's test report, which showed a high confidence level for SARS coronavirus infection, was spread to the public by Dr. A in CHW, who was called a "whistleblower". Unfortunately, Dr. A was diagnosed as COVID-19 infection later and passed away after five days. Similar to Dr. A, another five doctors in CHW passed away because of COVID-19 associated complications until now, and they are all honored as heroes in China.

Since December 2019, healthcare workers in Wuhan, China, worked with an increased workload and at risk of infection to treat patients with COVID-19 infection. SARS-CoV-2 has a strong transmission ability in Wuhan before travel restrictions when the virus median daily reproduction number ( $R_t$ ) was estimated as 2.35 [4]. In a Wuhan hospital case series, a super-spreader was confirmed to transmit SARS-CoV-2 to more than 10 physicians and nurses in the department [5]. As epidemics progressed and cases increased, healthcare workers were recognized as a group with high infection risk. Until 8th Mar 2020, 1496 health care workers were diagnosed with laboratory-confirmed COVID-19 in Wuhan, China, a large part of whom worked in CHW [3]. Healthcare workers have shown professionalism and care, but healthcare workers' physical and psychological health is under pressure when working with high infection risk.

Multiple studies have searched for the mental health of hospital staff through the method of questionnaires. It was reported that more than half of health care workers experienced depression and distress symptoms [6]. Nurses, women, frontline staff had worse mental health than others [6, 7]. Social support could help healthcare workers with decreased anxiety and stress and improved sleep quality [8]. In quantitative research using questionnaires above, the respondents are only allowed to answer predefined questions. For individual participants, questions not covered by the questionnaire might be highly relevant and therefore missed. Moreover, questionnaires do not allow personalized thoughts and feelings about topics [9, 10].

1  
2  
3 Therefore, qualitative research constitutes a feasible complement to exploring a phenomenon in  
4 depth.  
5

6  
7 No research articles are exploring the innermost thoughts of healthcare workers during  
8 COVID-19 epidemics with interviews until now. This study aimed to make an in-depth exploration  
9 of (a) describe the mental status of healthcare workers during COVID-19; (b) identify main  
10 factors upsetting healthcare workers; (c) characterize how the medical staff is relieved from  
11 pressure.  
12  
13

## 14 15 16 **Method**

### 17 18 19 **Design and patients**

20  
21 A qualitative survey was conducted on workers at the Central Hospital of Wuhan (CHW) between  
22 16<sup>th</sup> May, and 1<sup>st</sup> Jul 2020. Study participants were eligible if they worked in the CHW during the  
23 epidemic. All kinds of workers in the CHW, including doctors, nurses, administrative and support  
24 staff, were sampled for the study.  
25  
26

27  
28 Participants were selected through purposeful maximum variation sampling regarding age,  
29 sex, occupation, and working position for patients to accomplish full coverage. The number of  
30 participants was determined based on "saturation", a sense of closure that occurs when data  
31 collection ceases to provide important new information and when patterns in the data become  
32 evident. During the study, saturation was achieved after 38 interviews. To accomplish maximum  
33 variation, interviews continue with further participants to ensure that no new aspects emerged.  
34 In total, 53 healthcare workers completed the full survey, with a participation rate of 53/76  
35 (69.7%) based on the total number of individuals whom we invited to interview. All participants  
36 who accepted our invitation finished the full interview.  
37  
38  
39  
40

41  
42 This study was conducted in accordance with the Declaration of Helsinki. All of the participants  
43 agreed to participate. The Central Hospital of Wuhan Ethics Committee approved the study  
44 procedures. Verbal informed consent was obtained both before and after the interviews.  
45  
46

### 47 48 49 **Data collection**

50  
51 Data were gathered by semistructured interviews mostly through phone or internet  
52 communication tools such as Wechat and QQ due to social distancing. All interview audio was  
53 recorded and transcribed verbatim with participants' permission, after which interview  
54 transcripts were sent to participants via email for comments or corrections. Demographic data  
55 included age, gender, departments, professional titles, educational background, marriage status,  
56 occupation, occupation, working life, and COVID-19 infection history were collected.  
57

58  
59 The interview guide included questions regarding the experience of living and working during  
60 epidemics was designed with the help of professional qualitative researchers and distributed to



1  
2  
3 interviewers with associated experience (Supplementary file 1). Examples of initial questions  
4 were: "What did you experience during the epidemic?", "How did you feel when you heard of  
5 your colleagues' death?", "Has something changed after epidemic?". When needed, follow-up  
6 questions were posed. The interviews were carried out by at least one interviewers and lasted  
7 for 10–60 minutes. Six interviews were repeated for more than one time to clarify critical  
8 questions.

### 12 **Data analysis**

13  
14 The data was analyzed by a team of three trained qualitative researchers based on a qualitative  
15 content analysis method [11]. This approach is designed to interpret meaning from the content  
16 of interview data and, hence, adhere to the naturalistic paradigm. First, the interviews were read  
17 through several times in order to become acquainted with the content. They were then reread  
18 systematically to identify meaning units, such as words or text segments and patterns of  
19 meaning, which were also marked with a preliminary code. The team developed a structured  
20 codebook that included inductively derived codes that represented ideas that emerged from the  
21 data as well as deductively selected categories to organize the dataset. Second, the investigators  
22 conducted multiple rounds of codebook revision and interrater reliability testing until a minimum  
23 pooled kappa value greater than 0.8 was achieved by all coders to ensure the clarity of coding  
24 definitions. Periodic discussions among the investigators ensured consistency of coding and  
25 helped us reach agreement on codebooks. Third, those segments marked with similar codes  
26 were brought together and formed meaningful clusters, as far as possible the actual words  
27 expressed by the informants were used. Next, each cluster's statements were scrutinized and  
28 compared to find the central component and then fused into categories. The final categories  
29 were then compared to avoid obvious overlapping, and in the last step, the categories were  
30 compared and analyzed to reveal possible relationships or hierarchies between them.

31  
32 In addition, all excerpts from interviews in this paper were translated from Chinese by  
33 investigators and native English speakers cooperatively to convey the interviewees' semantics  
34 completely. This study is reported in accordance to the Consolidated criteria for reporting  
35 qualitative research (COREQ) checklist [12].

## 38 **Result**

39  
40  
41  
42  
43  
44  
45  
46  
47  
48  
49  
50  
51 Altogether, 53 healthcare workers were interviewed. Their ages ranged from 23 to 63 years  
52 (Mage = 39 years), and 32 (60.4%) participants were women. 18 healthcare workers were  
53 infected by COVID-19, and 40 participants treated COVID-19 patients in the frontline. All the  
54 participants were working in the Central Hospital of Wuhan during epidemics (Table 1).

55  
56  
57  
58  
59  
60  
The issues and connections are extracted from all interview data and summarized in the  
conceptual model, which was composed of healthcare workers' anxiety during different stages of

1  
2  
3 epidemics and related drivers and mediators (Figure 2).

#### 4 5 **Healthcare workers' anxiety during different stages of epidemics**

6  
7 Healthcare workers experienced a process of dynamic changes in emotions during the whole  
8 pandemic, which was divided into three stages.  
9

10 In the initial stage of the epidemics, most participants experienced few intrusive and  
11 frightening thoughts about their clinical work because they did not understand the severity of  
12 COVID-19. The Wuhan government released that "No clear evidence of human-to-human  
13 transmission was found. Therefore, this epidemic is preventable and controllable" in January  
14 2020, which made some participants lose their vigilance. However, participants from  
15 departments such as respiratory, infection, and emergency departments were more likely to be  
16 exposed to pneumonia patients and noticed a new kind of emerging respiratory disease.  
17 Therefore they were more vigilant and worried ahead of other healthcare workers.  
18  
19  
20  
21  
22

23 "At the beginning of the outbreak, I felt nothing because it had not happened besides before. I  
24 was not scared until people around me were infected" -26

25 "In the early stage of the epidemic, the emergency department staff was all transferred from  
26 other departments. The team leader was isolated because of the abnormal CT examination results,  
27 and she only taught me one day. Other nurses without enough professional skills often sat beside  
28 the consultation desk outside, and only I worked in the rescue room. Everyone was lazy and didn't  
29 want to do anything." -29

30 "Hmmm... In December, patients with similar symptoms(to COVID-19) appeared in our  
31 department. At that time, we were quite anxious. Although the number of cases increased in  
32 January, people from other departments came to support us, and more protective equipment was  
33 provided to us, so the situation is much better. By this time, we became accustomed to this state."  
34 -31 (Nurse, Respiratory department)

35  
36  
37  
38  
39  
40 As the epidemic progresses to its highest peak, almost all general practitioners in the hospital  
41 experienced infection or death around, including patients, colleagues, and even themselves.  
42 They began to realize the seriousness and severity of the epidemic. Most of our interviewees  
43 overflowed intense negative emotions such as "desperation", "depression", "fear" and "anxiety"  
44 after they heard or witnessed their colleague tortured by COVID-19 and worried about their  
45 health.  
46  
47  
48

49 "So desperate, there was definitely a desperate mood, most desperate in 6th Feb (when Dr. A  
50 passed away)... it's not suitable for elaboration... such famous ones are not cured. If me..." -41

51 "At first I didn't know it was COVID-19, so I wasn't afraid. Later, after a large number of patient  
52 cases were reported on the internet, I began to get scared." -50

53 "When I heard that the doctor in our hospital died, I was scared and wanted to cry. (silence). I  
54 don't know how to describe it." -13

55 "Very unreal feeling, kind of unbelievable, after all, they (doctors who died of COVID-19) were  
56 working with me before. I can't believe this news is true!" -15

57 "My family members were very worried about me and called me every day. Although I worried  
58  
59  
60

1  
2  
3 about myself, I was more scared about whether my family members would be infected.” -36  
4  
5

6 As time went by, people might gradually recover to calmness and pursue the tranquillity of  
7 post-virus life. Most frontline workers have gradually adapted to this state of work, with  
8 increasing cases being cured, and good news reported by the media. However, after the ending  
9 of Wuhan lockdown and the opening of outpatient service, the number of patients has dropped  
10 sharply than those before the epidemics, so healthcare workers' wages also decreased, which  
11 stressed participants who need to repay the loans. However, some participants were unwilling to  
12 mention what happened during COVID-19 epidemics and commit to new careers to minimize  
13 anxiety and pretend fearlessness.  
14  
15  
16  
17

18 “I’m very sorry. (silence) My comrades fighting side by side are gone forever. Strongly grieved for  
19 their families! I wanted to do something for them, so I participated in donations and contacted  
20 related foundations.” -4  
21

22 “About the occupation, the COVID-19, others’ death... I didn’t think deeply. Not dare to. I just  
23 wanted to have a good day every day.” -16  
24  
25

26 Nevertheless, several interviewees didn't seem to experience any emotional fluctuations from  
27 beginning to end, probably due to personal temperament and working experience.  
28

29 “When doctors in our hospital passed away, I’m not afraid at all. I only had two choices, either  
30 survive or die. I don’t care.” -42 (Infected doctor)  
31

32 “I experienced many ups and downs in my whole life. This epidemic is only one of the difficulties.  
33 I was not afraid, because I participated in the fight for SARS in Guangzhou in 2003” -17 (Second-line  
34 doctor)  
35  
36

### 37 **Drivers of healthcare workers' anxiety**

38  
39 This category was developed to capture the underlying causes of participants' anxiety during  
40 different epidemics stages in around five themes.  
41

42 ***Infection Risk***-SARS-CoV-2 is spread mainly by aerosolized droplets expelled during coughing,  
43 sneezing, or breathing with a robust transmission ability [4]. Healthcare workers have been  
44 particularly hard hit by SARS-CoV-2, with high reported infection rates from Italian data. Even a  
45 high percentage of asymptomatic healthcare workers were reported to test positive for  
46 SARS-CoV-2 according to PCR results [13]. Their anxiety was related to, and triggered by,  
47 examinations and treatments to confirmed and suspected patients, as there was always a  
48 potential infection risk. After getting off work and staying away from patients, the anxiety level  
49 temporarily decreased, but it increased again close to the next day at the hospital. Participants'  
50 anxiety for infection risk mainly occurred during the epidemic's peak and gradually disappeared  
51 as the epidemic was controlled.  
52  
53  
54  
55  
56

57 “At that time, I was crying with my roommate at home every day. In fact, I got only an ordinary  
58 lung infection.” -19  
59  
60

1  
2  
3 “Everyone could be infected, and I was no exception” -25

4 “Scared! I was really terrified! I was really afraid of getting infected. The isolation wards were full  
5 of COVID-19 confirmed patients” -3  
6  
7

8 **Supplies**-After the outbreak of COVID-19, the government imposed a strict lockdown in  
9 Wuhan, and many living supplies were difficult to obtain. Furthermore, the healthcare  
10 workforce's need for personal protective equipment (PPE) such as surgical masks and isolation  
11 gowns outpaced the supply in the early onset of COVID-19. Adequate supplies of PPE were  
12 identified as an effective protective strategy for the psychological distress by emerging virus  
13 outbreak on healthcare workers [14]. Participants without enough PPE worried about high  
14 infection risk for themselves and their families. Therefore, communities and governments  
15 provided adequate supplies to alleviate the shortage to minimize clinical staff burden.  
16  
17  
18  
19

20  
21 “After job transfer from respiratory medicine to CCU, no one cared about me. Totally  
22 helplessness. I couldn't get living supplies such as rice and noodles and buy food (because of  
23 lockdown in Wuhan)” -51  
24

25 “Living and protective supplies are sufficient. When everyone in the hospital was scrambling for  
26 supplies, a friend knew my situation and sent me two food boxes with bread and milk. I thought  
27 Wuhan was quite lovely at that time.” -34  
28

29 “Because of fundraising from all over the country and even around the world, healthcare  
30 workers including me were not short of living supplies, but my family still lacked supplies. During  
31 this period, I was more worried about my family than myself” -15  
32  
33

34 **Isolation**-WHO recommended that healthcare workers with suspected COVID-19 who present  
35 with mild or moderate symptoms should be encouraged to stay home and away from the  
36 workplace during illness[15]. It was reported that individuals, including healthcare workers who  
37 self-isolated at home, suffered from increased anxiety and stress [16]. Participants felt “so lonely  
38 as if abandoned by the world” and “be seemingly treated like a criminal” during the quarantine.  
39 In contrast to depression brought about by isolation, some participants prefer to confront the  
40 patients and continue the clinical work despite the high risk of infection.  
41  
42  
43  
44

45 “At the beginning of the epidemic, I was under a lot of psychological pressure. There was  
46 something wrong with the CT examination of the roommate's lungs, so I was also isolated at  
47 home”-49  
48

49 “I'm afraid of isolation. No matter how good the environment is, I can't accept isolation. I am  
50 willing to work in the hospital rather than being isolated. In order not to be isolated, it is necessary  
51 to rest well and boost immunity.” -22  
52  
53

54 **Media**-Although WHO has produced guidance for opinion-makers and the media on how to  
55 describe the outbreak, few local and social media strictly obeyed them in the initial stage of the  
56 epidemics yet, which stressed healthcare workers deeply [17]. For example, some media  
57 presumed the possibility of healthcare workers having or spreading COVID-19 rather than  
58 highlighting the effectiveness of preventive measures, and therefore some people worried about  
59  
60

1  
2  
3 contact with their neighbors who worked in the hospital.  
4

5 In addition, many Healthcare staff learned about the infection or death of their colleagues  
6 through social media, which made them mourn for the loss and also scared of being infected. An  
7 interviewee quoted a Chinese colloquialism to express her sorrow: *The fox mourns over the*  
8 *hare's death.*  
9

10  
11 "During the epidemic, I lived in a hotel close to the hospital rather than at home. The  
12 management company in my community was not willing to allow me to enter it after hearing that  
13 many doctors in our hospital were infected." -37

14  
15 "When I was treated for COVID-19, all kinds of bad news appeared, especially which doctors in  
16 our hospital passed away. (Appeared surprised) I tried not to watch bad news, but It is impossible  
17 to block social media from all my friends. After reading them, I was afraid that I would not be  
18 cured. Therefore, when the doctor told me to use the immunity-enhancing drugs at my own  
19 expense, and I said: 'use them, no matter how much they cost.'" -53  
20  
21

22  
23 **Financial Status**-During the peak of epidemics, healthcare workers received an allowance  
24 from the government for treating COVID-19 patients. The government reimbursed people  
25 infected by COVID-19 in China for all treatment costs, and infected healthcare staff can also claim  
26 workers' compensation insurance. Therefore, few healthcare workers were anxious about their  
27 financial status during the peak of epidemics. However, after the ending of Wuhan lockdown and  
28 the opening of outpatient service, participants complained that salaries were not satisfied after  
29 the epidemic was under control because the government canceled allowance and patients unwill  
30 to visit the hospital for fear of infection risk, which decreased hospital profits. Some interviewees  
31 also felt that their efforts and sacrifice had not been reasonably compensated and eager to  
32 obtain adequate financial rewards.  
33

34  
35 "Will my salary be raised in the future? It is too low to support myself now" -30  
36

37  
38 "But I think we are really the cheapest labor force because I met my classmates on Sunday, they  
39 worked in Didi (a taxi company) and drove medically equipped vehicles during the epidemic? They  
40 earned more than 100,000 yuan (\$14,000) in a single week! They really made more than 100,000  
41 yuan! But how much for us? really cheap labor!" -21  
42  
43  
44  
45

#### 46 **Self mediators of healthcare workers' anxiety**

47  
48 In the face of high occupational risk, healthcare workers developed their own way to defend  
49 themselves from anxiety and depression.  
50

51  
52 **Occupational attitude**-Most healthcare staff decided to take up medicine as a career tended to  
53 endorse altruistic reasons (working with people, helping others) rather than the possibility to  
54 achieve high social status and financial stability [18]. Under the threat of COVID-19, participants  
55 identified the desire to rescue patients as a motivation for themselves.  
56

57  
58 "The doctors' duty is to heal the wounded and rescue the dying" -41

59 "I never thought of resignation, and still have full-hearted enthusiasm. Many colleagues returned  
60

1  
2  
3 to work immediately after recovery from COVID-19” -33

4 “Everyone has their own responsibilities in their positions. I have a clear conscience only if I do  
5 my best”-17  
6  
7

8 ***Fitness***-A high level of cardiorespiratory fitness caused by prior exercise training reduces  
9 all-cause mortality and may confer some protection against COVID-19 [19]. Two infected  
10 participants kept in satisfactory physical condition before and had a strong belief in being cured  
11 of COVID-19. In addition, patients with younger age were identified with a good prognosis, which  
12 boosted some young participants [19].  
13  
14  
15

16 “There is no special medicine for COVID-19. It’s totally dependent on your immunity. I always  
17 exercised before, so I wasn't injected with immunoglobulin while being infected.” -28

18 “I limited energy intake to lose weight before. However, my workload suddenly increased, and I  
19 need to maintain a proper diet to supplement nutrition after COVID-19 epidemics.”-52  
20  
21  
22

23 ***Entertainment***-Entertainment such as videos, computer games, and other personal hobbies at  
24 home has considerable potential for relieving healthcare workers from reality pressure. Several  
25 interviewees were addicted to personal hobbies to escape from the disturbance of work fatigue  
26 and anxiety for relatives' health.  
27  
28

29 “My boyfriend gifted me a microphone, and I sang at home. Later, I felt that I couldn't stand it  
30 and applied for a photography class at home. There is always something to do, in case I thought so  
31 much.”-14  
32

33 “Eat, drink, and sleep when I should. Watch TV drama or play video games when I’m free.”-11

34 “When I was hospitalized, I played ‘Honor of Kings’ (a mobile MOBA game) every day.”-32  
35  
36

37 ***Religion***-Only one participant sought help from religion to stay away from negative moods  
38 under the pressure of frequent infections of companions. During the pandemic, places of  
39 worship such as temples, churches, synagogues, and mosques were also closed in Wuhan, which  
40 interrupted most of the religious activities. Therefore, she sought spiritual peace by “copying the  
41 Buddhist sutras at home”.  
42  
43  
44

45 “After I got off work, I copied the Buddhist sutras at home, The power of religious belief has  
46 always supported me”-29  
47  
48

#### 49 **Interpersonal mediators of healthcare workers' anxiety**

50 Confronting patients and colleagues' successive deaths, many participants experienced heavy  
51 psychological pressure and sought help from other people, including colleagues, families, friends,  
52 patients, and society (Table 2).  
53  
54

55 During working hours, colleagues companion played a significant role in relieving loneliness  
56 and horror. Participants “rushed to the front” similar to soldiers and treated their colleagues as  
57 comrades-in-arms. Some infected interviewees experienced a dramatic change of identity from  
58 doctors/nurses to patients and desired more psychological support from their health carers also  
59  
60

1  
2  
3 colleagues. In addition, patients also expressed their gratitude to some participants for their  
4 dedication. After getting off work, Most of the participants felt less anxious and depressed by  
5 communicating with their families and friends, who always encouraged them to hold on.  
6  
7 Participants' family relived them of the negative emotional state by encouragement, care, and  
8 comfort. Sometimes, participants were unwilling to share their anxiety with their families  
9  
10 "because the family would be more worried and sleepless". Furthermore, the government and  
11 hospital provided living and protective materials "as much as possible", which were  
12  
13 indispensable for living during epidemics and lockdown in Wuhan.  
14  
15

## 16 Discussion

17  
18  
19 Our findings suggest that healthcare workers experienced a process of dynamic changes in  
20 emotions during different stages of COVID-19 epidemics. While these emotions may be  
21 mitigated or exacerbated by the working experience, environment, and health status,  
22 participants' reports suggest these experiences are pervasive. Our conceptual model illustrates  
23 the role of infection risk, isolation, media, supplies, and financial status in triggering emotional  
24 responses. Besides, our data suggest multiple ways healthcare workers recover from affliction,  
25 not only by themselves but also by other people, including colleagues, families, friends, patients,  
26 and society.  
27  
28

29  
30  
31 In this study, a significant proportion of participants experienced anxiety and depression  
32 symptoms during epidemics[21]. Although our participants were from the Central Hospital of  
33 Wuhan (CHW), the highlighted mental problems of medical staffs are not unique to the single  
34 hospital: a cross-sectional comparison of 34 hospitals found that health care workers  
35 experienced symptoms of depression, anxiety, insomnia, and distress during COVID-19 epidemics  
36 [6]. It was reported that high-risk groups of mental health symptoms were nurses, women,  
37 frontline health care workers, and those working in Wuhan, China, who accounted for 35% of  
38 interviewees in this study [6].  
39  
40  
41

42  
43  
44 Our research population came from a particular hospital in Wuhan, where the COVID-19  
45 epidemics firstly broke out, and more medical workers here passed away due to infection than  
46 all other hospitals. Chinese and even the world media focused on the status of workers in this  
47 hospital during the epidemic. Due to tremendous pressure from multiple factors, healthcare  
48 workers might undergo more serious anxiety than those of other hospitals. Thereby, they  
49 represent the majority of healthcare workers worldwide who are under severe psychological  
50 stress during epidemics.  
51  
52

53  
54  
55 Our findings extend research on mental health in the medical workplace during a public crisis  
56 and provide a view of death anxiety directly from the perspective of those who experience it. It  
57 was reported that physicians' death anxiety for patients did not relate to decision making during  
58 clinical treatment but guilt or doubt after a patient's death[22]. However, few studies focused on  
59  
60

1  
2  
3 physicians' death anxiety for their colleagues, and participants in our study revealed significantly  
4 declined working enthusiasm and efficiency due to high stress. In fact, the local government and  
5 hospitals had predicted high mental pressure among healthcare workers in advance and offered  
6 professional psychological counseling and related questionnaires to them [23]. Nevertheless,  
7 none participants expressed their benefits from these measures, indicating these psychological  
8 intervenes were invalid and insufficient to alleviate the psychological issues.  
9  
10  
11

### 12 **Strengths and limitations**

13  
14 This study is the first qualitative study to examine healthcare workers' mental health, also the  
15 first studies focusing on drivers and mediators of healthcare workers' anxiety during COVID-19  
16 epidemics to date.  
17  
18

19  
20 A few limitations need to be considered when interpreting our findings. First, the timing of  
21 administering the interviews might affect the results. The participants likely had less anxiety  
22 because they were just assured that they would not be infected with COVID19 after the  
23 well-controlled epidemic in Wuhan. Second, all participants were voluntary to take part in the  
24 research. Although we randomly sampled healthcare workers and successfully invited most of  
25 them to interview, some personnel suffered severely would be less inclined to participate.  
26  
27 Finally, due to social distance and city lockdown, many participants could not be directly  
28 interviewed through a face-to-face way, which is less convenient to convey emotions. In order to  
29 catch participants' faces and actions, video calls and online conference app were recommended  
30 if permitted by interviewees.  
31  
32  
33

### 34 **Conclusion**

35  
36 Our research provides new insights into the cause and regulation of anxiety during epidemics of  
37 highly transmissible disease on healthcare workers and raises problems about the protective  
38 measure for psychology and physiology. Although the government and society provide materials  
39 and spirit supports as much as possible, most of the healthcare workers still felt neglected and  
40 anxious for infection risk and income levels. Special mental interventions and protective  
41 equipment to healthcare workers need to be immediately carried out, especially in the districts  
42 and hospitals affected seriously by COVID-19. Healthcare workers in the epidemic-controlled  
43 district have less infection risk but also lower-income, so they benefited more from financial  
44 compensation.  
45  
46  
47  
48  
49  
50  
51

52 MLF, BX and TT contributed equally to this work.

53  
54 **Author Contributions:** MLF and ZHW conceived of the study and analysis plan. MLF, BX, TT and  
55 YH collected data. MLF and ZHW analyzed the data. ZHW drafted the conceptual model. MLF and  
56 ZHW wrote the first draft of the manuscript. All authors contributed to the interpretation of the  
57 data, edited the manuscript, and approved of the final manuscript. ZHW had full access to all the  
58 data in the study and had final responsibility for the decision to submit for publication.  
59  
60



1  
2  
3 **Funding:** No funding  
4

5 **Competing interests:** All authors have completed the ICMJE uniform disclosure form at  
6 [www.icmje.org/coi\\_disclosure.pdf](http://www.icmje.org/coi_disclosure.pdf) and declare: no support from any organization for the  
7 submitted work.  
8  
9

10 **Data sharing:** No additional data are available.  
11

12 The lead author affirms that this manuscript is an honest, accurate, and transparent account of  
13 the study being reported; that no important aspects of the study have been omitted; and that  
14 any discrepancies from the study as planned (and, if relevant, registered) have been explained.  
15  
16  
17  
18  
19  
20  
21  
22  
23  
24  
25  
26  
27  
28  
29  
30  
31  
32  
33  
34  
35  
36  
37  
38  
39  
40  
41  
42  
43  
44  
45  
46  
47  
48  
49  
50  
51  
52  
53  
54  
55  
56  
57  
58  
59  
60

For peer review only

## References:

- [1]. Wu, F., et al., A new coronavirus associated with human respiratory disease in China. *Nature*, 2020. 579(7798): p. 265-269.
- [2]. Johns Hopkins Coronavirus Resource Center. <https://coronavirus.jhu.edu/>.
- [3]. Pan, A., et al., Association of Public Health Interventions With the Epidemiology of the COVID-19 Outbreak in Wuhan, China. *JAMA*, 2020. 323(19): p. 1915.
- [4]. Kucharski, A.J., et al., Early dynamics of transmission and control of COVID-19: a mathematical modelling study. *The Lancet Infectious Diseases*, 2020. 20(5): p. 553-558.
- [5]. Wang, D., et al., Clinical Characteristics of 138 Hospitalized Patients With 2019 Novel Coronavirus – Infected Pneumonia in Wuhan, China. *JAMA*, 2020. 323(11): p. 1061.
- [6]. Lai, J., et al., Factors Associated With Mental Health Outcomes Among Health Care Workers Exposed to Coronavirus Disease 2019. *JAMA Network Open*, 2020. 3(3): p. e203976.
- [7]. Li, Z., et al., Vicarious traumatization in the general public, members, and non-members of medical teams aiding in COVID-19 control. *Brain, Behavior, and Immunity*, 2020.
- [8]. Xiao, H., et al., The Effects of Social Support on Sleep Quality of Medical Staff Treating Patients with Coronavirus Disease 2019 (COVID-19) in January and February 2020 in China. *Med Sci Monit*, 2020. 26: p. e923549.
- [9]. Halley, M.C., et al., Physician mothers' experience of workplace discrimination: a qualitative analysis. *BMJ*, 2018: p. k4926.
- [10]. Beverly, E.A., et al., Understanding Physicians' Challenges When Treating Type 2 Diabetic Patients' Social and Emotional Difficulties: A qualitative study. *Diabetes Care*, 2011. 34(5): p. 1086-1088.
- [11]. Hsieh, H. and S.E. Shannon, Three Approaches to Qualitative Content Analysis. *Qualitative Health Research*, 2016. 15(9): p. 1277-1288.
- [12]. Tong, A., P. Sainsbury and J. Craig, Consolidated criteria for reporting qualitative research (COREQ): a 32-item checklist for interviews and focus groups. *International Journal for Quality in Health Care*, 2007. 19(6): p. 349-357.
- [13]. Treibel, T.A., et al., COVID-19: PCR screening of asymptomatic healthcare workers at London hospital. *The Lancet*, 2020. 395(10237): p. 1608-1610.
- [14]. Kisely, S., et al., Occurrence, prevention, and management of the psychological effects of emerging virus outbreaks on healthcare workers: rapid review and meta-analysis. *BMJ*, 2020: p. m1642.

- 1  
2  
3  
4 [15]. World Health Organization. Global surveillance for COVID-19 caused by human infection with  
5 COVID-19 virus.  
6 [https://www.who.int/publications/i/item/global-surveillance-for-covid-19-caused-by-human-infection-](https://www.who.int/publications/i/item/global-surveillance-for-covid-19-caused-by-human-infection-with-covid-19-virus-interim-guidance)  
7 [with-covid-19-virus-interim-guidance.](https://www.who.int/publications/i/item/global-surveillance-for-covid-19-caused-by-human-infection-with-covid-19-virus-interim-guidance)  
8  
9  
10 [16]. Xiao, H., et al., Social Capital and Sleep Quality in Individuals Who Self-Isolated for 14 Days  
11 During the Coronavirus Disease 2019 (COVID-19) Outbreak in January 2020 in China. *Medical*  
12 *Science Monitor*, 2020. 26.  
13  
14 [17]. World Health Organization. Social Stigma associated with COVID-19. A guide to preventing and  
15 addressing social stigma. World Health Organization.  
16 <https://www.who.int/docs/default-source/%20coronaviruse/covid19-stigma-guide.pdf>, 2020.  
17  
18 [18]. Peel, J.K., C.M. Schlachta and N.A. Alkhamesi, A systematic review of the factors affecting  
19 choice of surgery as a career. *Can J Surg*, 2018. 61(1): p. 58-67.  
20  
21 [19]. Kodama, S., et al., Cardiorespiratory Fitness as a Quantitative Predictor of All-Cause Mortality  
22 and Cardiovascular Events in Healthy Men and Women: A Meta-analysis. *JAMA*, 2009. 301(19): p.  
23 2024-2035.  
24  
25 [20]. Zhou, F., et al., Clinical course and risk factors for mortality of adult inpatients with COVID-19 in  
26 Wuhan, China: a retrospective cohort study. *The Lancet*, 2020. 395(10229): p. 1054-1062.  
27  
28 [21]. COVID-19: protecting healthcare workers. *The Lancet*, 2020. 395(10228): p. 922.  
29  
30 [22]. Draper, E.J., et al., Relationship between physicians' death anxiety and medical communication  
31 and decision-making: A systematic review. *Patient Education and Counseling*, 2019. 102(2): p.  
32 266-274.  
33  
34 [23]. Wang, C., et al., A novel coronavirus outbreak of global health concern. *Lancet*, 2020.  
35 395(10223): p. 470-473.  
36  
37  
38  
39  
40  
41  
42  
43

### Figure Captions

44  
45 **Figure 1:** Milestone events in the Central Hospital of Wuhan during the epidemic of  
46 COVID-19.  
47

48  
49 **Figure 2:** Conceptual model of themes and relationships derived from healthcare  
50 workers' anxiety during different stages of epidemics.  
51  
52  
53  
54  
55  
56  
57  
58  
59  
60

**Table1: Demographic and Occupational Characteristics of interviewees.**

|                       |                    | Number |
|-----------------------|--------------------|--------|
| No. of interviewees   |                    | 53     |
| Gender                | Male               | 21     |
|                       | Female             | 32     |
| Mean age, years       | (range), years     | 23-63  |
| Infection by COVID-19 | Yes                | 18     |
|                       | No                 | 35     |
| Working position      | Front-line         | 40     |
|                       | Second-line        | 13     |
| Working life          | (range), years     | 1-32   |
| Occupation            | Physician          | 18     |
|                       | Nurse              | 24     |
|                       | Others in hospital | 11     |
| Marriage status       | Unmarried          | 33     |
|                       | Married            | 20     |
| Education background  | ≤Undergraduate     | 36     |
|                       | ≥Postgraduate      | 17     |

| <b>Table 2. Interpersonal mediators of healthcare workers' anxiety</b> |                                                                                                                                                                                                                                                                                                                                                                                                                                                                                                                                                                                                                                                 |
|------------------------------------------------------------------------|-------------------------------------------------------------------------------------------------------------------------------------------------------------------------------------------------------------------------------------------------------------------------------------------------------------------------------------------------------------------------------------------------------------------------------------------------------------------------------------------------------------------------------------------------------------------------------------------------------------------------------------------------|
| Theme                                                                  | Exemplary quotes                                                                                                                                                                                                                                                                                                                                                                                                                                                                                                                                                                                                                                |
| Colleagues                                                             | <p>"Many colleagues are rushing to the front, so I have no reason to back down." -36</p> <p>"None in my family was infected, because a teacher in our department is very cautious. Before the New Year, when the epidemic was not exposed to the public, she already told me some precautions, such as keeping social distance and dining with public chopsticks." -48</p> <p>"When I was diagnosed as COVID-19 and hospitalized, there were still very few beds. The chief nurse reported my situation to the public health department and arranged a bed for me. Doctors and nurses were very kind, maybe because we worked together" -44</p> |
| Family                                                                 | <p>"Daily video with my family. I told them I am much better now and what medicine I used today. When I was dining outside the ward, I took down my mask and showed them that I was okay. In the later period, when I was about to be discharged from the hospital, they were completely relieved." -6</p> <p>"My deepest thought (when I was infected and hospitalized)? I have my wife and my family. I must live a very healthy life. I still look forward to living in this world." -7</p>                                                                                                                                                  |
| Friends                                                                | <p>"I once collapsed. There were only three or five COVID-19 confirmed patients every day before. However, the number increased by tens of thousands those days, and I couldn't bear it. But I couldn't tell my mother because she would be more worried and sleepless. So I talked with my friends, which made me feel better." -3</p> <p>"When I was upset, I talked to my good friend and complained about something." -37</p>                                                                                                                                                                                                               |
| Patients                                                               | <p>"The lady who lived beside my bed was kind to me. She was always comforting me. She said: 'Although I had a basic illness like diabetes, I am much better now. The effusion of my lungs is almost absorbed.' Her words made me feel much better. I was so lucky that she was always encouraging me and chatting with me." -41</p>                                                                                                                                                                                                                                                                                                            |
| Society                                                                | <p>"I was isolated at home for two months. The government sent us supplies and relief" -29</p> <p>"The hospital helped us solve life problems as much as possible and gave us masks when we came to work every day. But few financial support." -32</p>                                                                                                                                                                                                                                                                                                                                                                                         |

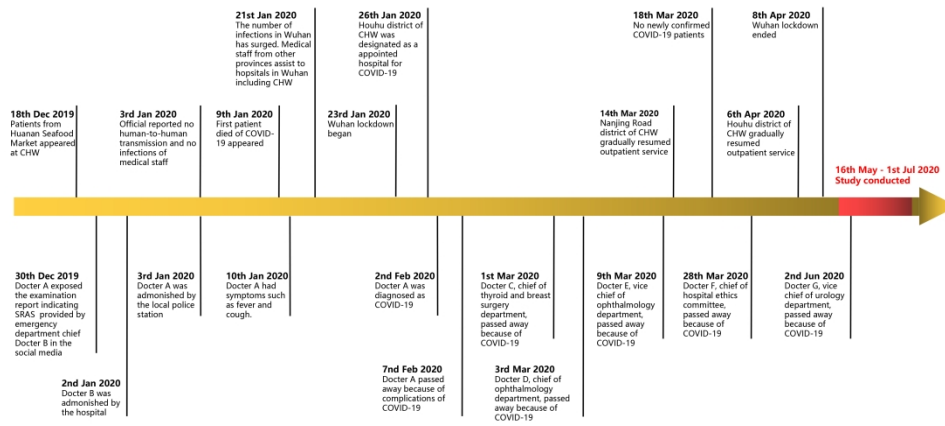

Milestone events in the Central Hospital of Wuhan during the epidemic of COVID-19.

399x190mm (300 x 300 DPI)

1  
2  
3  
4  
5  
6  
7  
8  
9  
10  
11  
12  
13  
14  
15  
16  
17  
18  
19  
20  
21  
22  
23  
24  
25  
26  
27  
28  
29  
30  
31  
32  
33  
34  
35  
36  
37  
38  
39  
40  
41  
42  
43  
44  
45  
46  
47  
48  
49  
50  
51  
52  
53  
54  
55  
56  
57  
58  
59  
60

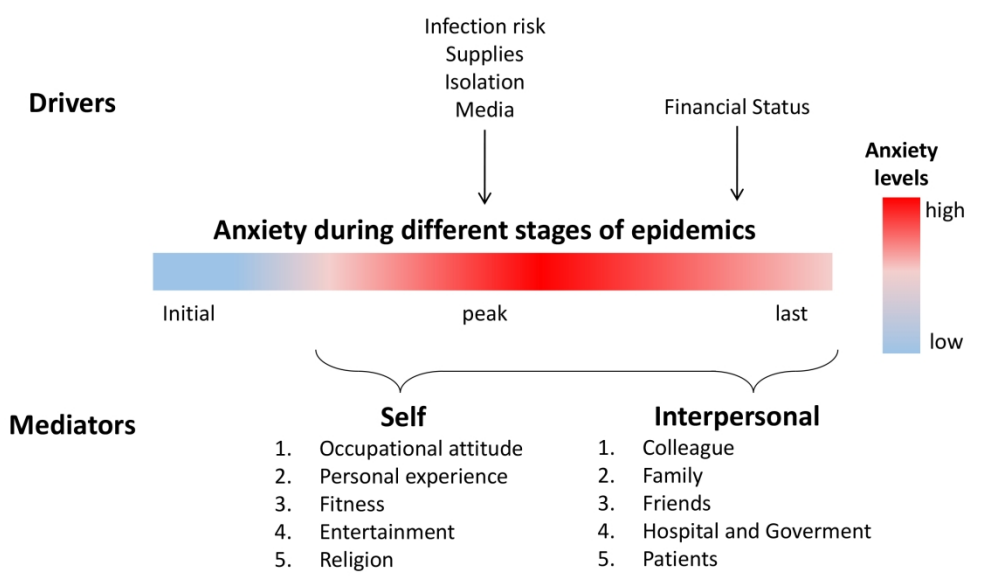

Conceptual model of themes and relationships derived from healthcare workers' anxiety during different stages of epidemics.

## Interview Guideline

### Basic information:

Age, Gender, Marriage status, Education level, Department, Working life, Occupation, Education background, COVID-19 infection history, Working position during epidemics

### Key points at the beginning of the interview:

1. Thank you for participating in this research
2. This interview will be recorded and transcribed verbatim
3. Personal information will be kept confidential, and part of the interview will be used to publish.

### The main content of the interview (for non-infected participants):

1. How did you feel at the beginning of the epidemic? When did you begin to realize the severity of the epidemic? How did you understand these? Could you talk about your inner thoughts when you heard that other colleagues in our hospital were infected? Why did you have these feelings?
2. (for front-line participants) When were you transferred to another department (for treating COVID-19 patients)? How long? Working position? Emotional reaction when you heard this news for the first time? Emotion change during this period? Why was there such a change? What were your more impressive experiences?
3. (for second-line participants) What were your main tasks during the epidemic? Emotion change during this period? Why was there such a change? What were your more impressive experiences?
4. Were you afraid during the epidemic? Why? Did you have depression or insomnia during this period? If so, to what extent? What supports you until now? How did you adjust yourselves? What intervention measures did the hospital provide correspondingly (such as classes, supplies, etc.)?
5. Were you worried about your family during this period? How to balance work and family? What troubles has this epidemic brought to your family and life, and how did you deal with



1  
2  
3 it?  
4  
5

- 6 6. How did you feel when you heard the sad news of the death of several doctors in our  
7 hospital? Will there be self-doubt or even questioning this job? why?  
8  
9  
10 7. Now that the epidemic has been controlled effectively, how do you feel? why? Have there  
11 been any changes in life attitudes after experiencing the epidemic? New understanding of  
12 this job? Have you ever thought of resigning? Why? If so, is there still such an idea now?  
13 What made you change your mind/what idea made you choose to persist?  
14  
15  
16 8. Do you have anything else to say? Regarding this epidemic, can you share with some  
17 suggestions based on your own experience?  
18  
19  
20 9. What are your expectations for the future?  
21  
22  
23  
24

25 **The main content of the interview (for infected participants):**

- 26  
27 1. How did you feel at the beginning of the epidemic? When did you begin to realize the  
28 severity of the epidemic? How did you understand these?  
29  
30  
31 2. When did the symptoms appear? What was your inner thought at the time? When were you  
32 diagnosed with COVID-19? Feelings after the diagnosis? What is the inner change from  
33 symptom to diagnosis?  
34  
35  
36 3. How did you feel during the treatment? Did you have depression or insomnia during this  
37 period? If so, to what extent? What supports you until now? How did you adjust yourselves?  
38 What intervention measures did the hospital provide correspondingly?  
39  
40  
41 4. Had your family been infected? If so, what is their situation? How did you maintain contact  
42 during this time? They must be very worried about you, how did you deal with it?  
43  
44  
45 5. How did you feel when you heard the sad news of the death of several doctors in our  
46 hospital? Will there be self-doubt or even questioning this job? why?  
47  
48  
49 6. You have recovered, resumed work, and returned to your position now. Have there been any  
50 changes in life attitudes after experiencing the epidemic? New understanding of this job?  
51 Have you ever thought of resigning? Why? If so, is there still such an idea now? What made  
52 you change your mind/what idea made you choose to persist?  
53  
54  
55  
56 7. Do you have anything else to say? Regarding this epidemic, can you share with some  
57 suggestions based on your own experience?  
58  
59  
60 8. What are your expectations for the future?

**Interview requirements:**

1. In-depth and sincere conversations. No simple questions and answers, but the interviewer actively grasps the true psychological feelings of the interviewee, and specifically understands his/her situation during COVID-19 epidemics, such as anxiety, fear, doubt, or luck, pride, and excitement. Talk like an old friend and increase the closeness of the interviewee.
2. Participants are not necessarily willing to admit true feelings. They may not be embarrassed to say that they are particularly scared during the epidemic, but the interviewer can slowly get in touch with their true thoughts through many indirect questions: "What did you think when \*\*\* were diagnosed with COVID-19?" "Have you ever suspected that you have been infected with SARS-COV-19?". As the interview proceeds, it is normal for the interviewee to have inconsistent remarks.
3. This interview is semi-structured, which means that the main content must be covered, but the way of asking can not be restricted to a fixed format
4. Mainly focus on personal inner emotional experience, do not involve some politically sensitive topics.

## Consolidated criteria for reporting qualitative studies (COREQ): 32-item checklist

| No                                                 | Item                    | Guide questions/description                                 | Page No. | Relevant text from manuscript                                |
|----------------------------------------------------|-------------------------|-------------------------------------------------------------|----------|--------------------------------------------------------------|
| <b>Domain 1:<br/>Research team and reflexivity</b> |                         |                                                             |          |                                                              |
| Personal Characteristics                           |                         |                                                             |          |                                                              |
| 1.                                                 | Interviewer/facilitator | Which author/s conducted the interview or focus group?      | 12       | MLF, BX, TT and YH collected data.                           |
| 2.                                                 | Credentials             | What were the researcher's credentials? <i>E.g. PhD, MD</i> | 1        |                                                              |
| 3.                                                 | Occupation              | What was their occupation at the time of the study?         | 1        |                                                              |
| 4.                                                 | Gender                  | Was the researcher male or female?                          | 1        |                                                              |
| 5.                                                 | Experience and          | What experience or training did the                         | 4,5      | The data was analyzed by a team of three trained qualitative |

| No | Item                                     | Guide questions/description                                                                                     | Page No. | Relevant text from manuscript                                                                                                                                                                                                                                                                                                                                                                                                                                                                                    |
|----|------------------------------------------|-----------------------------------------------------------------------------------------------------------------|----------|------------------------------------------------------------------------------------------------------------------------------------------------------------------------------------------------------------------------------------------------------------------------------------------------------------------------------------------------------------------------------------------------------------------------------------------------------------------------------------------------------------------|
|    | training                                 | researcher have?                                                                                                |          | <p>researchers based on a qualitative content analysis method. In addition, all excerpts from interviews in this paper were translated from Chinese by investigators and native English speakers cooperatively to convey the interviewees' semantics completely.</p> <p>The interview guide included questions regarding the experience of living and working during epidemics was designed with the help of professional qualitative researchers and distributed to interviewers with associated experience</p> |
|    | Relationship with participants           |                                                                                                                 |          |                                                                                                                                                                                                                                                                                                                                                                                                                                                                                                                  |
| 6. | Relationship established                 | Was a relationship established prior to study commencement?                                                     | 4        | No relationship                                                                                                                                                                                                                                                                                                                                                                                                                                                                                                  |
| 7. | Participant knowledge of the interviewer | What did the participants know about the researcher? <i>e.g. personal goals, reasons for doing the research</i> | 4        | Nothing                                                                                                                                                                                                                                                                                                                                                                                                                                                                                                          |
| 8. | Interviewer                              | What characteristics were reported                                                                              | 4        | The interview guide included questions regarding the experience                                                                                                                                                                                                                                                                                                                                                                                                                                                  |

| No                                | Item                                  | Guide questions/description                                                                                                                                     | Page No. | Relevant text from manuscript                                                                                                                                                                      |
|-----------------------------------|---------------------------------------|-----------------------------------------------------------------------------------------------------------------------------------------------------------------|----------|----------------------------------------------------------------------------------------------------------------------------------------------------------------------------------------------------|
|                                   | characteristics                       | about the interviewer/facilitator?<br>e.g. <i>Bias, assumptions, reasons and interests in the research topic</i>                                                |          | of living and working during epidemics was designed with the help of professional qualitative researchers and distributed to interviewers with associated experience                               |
| <b>Domain 2:<br/>study design</b> |                                       |                                                                                                                                                                 |          |                                                                                                                                                                                                    |
| Theoretical framework             |                                       |                                                                                                                                                                 |          |                                                                                                                                                                                                    |
| 9.                                | Methodological orientation and Theory | What methodological orientation was stated to underpin the study? <i>e.g. grounded theory, discourse analysis, ethnography, phenomenology, content analysis</i> | 4        | The data was analyzed by a team of three trained qualitative researchers based on a qualitative content analysis method                                                                            |
| Participant selection             |                                       |                                                                                                                                                                 |          |                                                                                                                                                                                                    |
| 10.                               | Sampling                              | How were participants selected? <i>e.g. purposive, convenience, consecutive, snowball</i>                                                                       | 4        | participants were selected through purposeful maximum variation sampling regarding age, sex, occupation, and working position for patients to accomplish full coverage. The number of participants |

| No      | Item                       | Guide questions/description                                                           | Page No. | Relevant text from manuscript                                                                                                                                                                                                                          |
|---------|----------------------------|---------------------------------------------------------------------------------------|----------|--------------------------------------------------------------------------------------------------------------------------------------------------------------------------------------------------------------------------------------------------------|
|         |                            |                                                                                       |          | was determined based on "saturation", a sense of closure that occurs when data collection ceases to provide important new information and when patterns in the data become evident.                                                                    |
| 11.     | Method of approach         | How were participants approached?<br><i>e.g. face-to-face, telephone, mail, email</i> | 4        | Data were gathered by semistructured interviews mostly through phone or internet communication tools such as Wechat and QQ due to social distancing.                                                                                                   |
| 12.     | Sample size                | How many participants were in the study?                                              | 5        | Altogether, 53 healthcare workers were interviewed.                                                                                                                                                                                                    |
| 13.     | Non-participation          | How many people refused to participate or dropped out? Reasons?                       | 4        | In total, 53 healthcare workers completed the full survey, with a participation rate of 53/76 (69.7%) based on the total number of individuals whom we invited to interview. All participants who accepted our invitation finished the full interview. |
| Setting |                            |                                                                                       |          |                                                                                                                                                                                                                                                        |
| 14.     | Setting of data collection | Where was the data collected? <i>e.g. home, clinic, workplace</i>                     | 4        | Data were gathered by semistructured interviews mostly through phone or internet communication tools such as Wechat and QQ due to social distancing.                                                                                                   |

1  
2  
3  
4  
5  
6  
7  
8  
9  
10  
11  
12  
13  
14  
15  
16  
17  
18  
19  
20  
21  
22  
23  
24  
25  
26  
27  
28  
29  
30  
31  
32  
33  
34  
35  
36  
37  
38  
39  
40  
41  
42  
43  
44  
45  
46

| No              | Item                         | Guide questions/description                                                              | Page No. | Relevant text from manuscript                                                                                                                                                                                                                                                                                                                                                                                                                                                                        |
|-----------------|------------------------------|------------------------------------------------------------------------------------------|----------|------------------------------------------------------------------------------------------------------------------------------------------------------------------------------------------------------------------------------------------------------------------------------------------------------------------------------------------------------------------------------------------------------------------------------------------------------------------------------------------------------|
| 15.             | Presence of non-participants | Was anyone else present besides the participants and researchers?                        | 4        | none                                                                                                                                                                                                                                                                                                                                                                                                                                                                                                 |
| 16.             | Description of sample        | What are the important characteristics of the sample? <i>e.g. demographic data, date</i> | 4        | Demographic data included age, gender, departments, professional titles, educational background, marriage status, occupation, occupation, working life, and COVID-19 infection history were collected.                                                                                                                                                                                                                                                                                               |
| Data collection |                              |                                                                                          |          |                                                                                                                                                                                                                                                                                                                                                                                                                                                                                                      |
| 17.             | Interview guide              | Were questions, prompts, guides provided by the authors? Was it pilot tested?            | 4        | The interview guide included questions regarding the experience of living and working during epidemics was designed with the help of professional qualitative researchers and distributed to interviewers with associated experience (Supplementary file 1). Examples of initial questions were: "What did you experience during the epidemic?", "How did you feel when you heard of your colleagues' death?", "Has something changed after epidemic?". When needed, follow-up questions were posed. |
| 18.             | Repeat interviews            | Were repeat interviews carried out? If yes, how many?                                    | 4        | Six interviews were repeated for more than one time to clarify critical questions.                                                                                                                                                                                                                                                                                                                                                                                                                   |

| No                                              | Item                   | Guide questions/description                                              | Page No. | Relevant text from manuscript                                                                                                                                                               |
|-------------------------------------------------|------------------------|--------------------------------------------------------------------------|----------|---------------------------------------------------------------------------------------------------------------------------------------------------------------------------------------------|
| 19.                                             | Audio/visual recording | Did the research use audio or visual recording to collect the data?      | 4        | All interview audio was recorded and transcribed verbatim with participants' permission, after which interview transcripts were sent to participants via email for comments or corrections  |
| 20.                                             | Field notes            | Were field notes made during and/or after the interview or focus group?  | 4        | No                                                                                                                                                                                          |
| 21.                                             | Duration               | What was the duration of the interviews or focus group?                  | 4        | The interviews were carried out by at least one interviewers and lasted for 10–60 minutes.                                                                                                  |
| 22.                                             | Data saturation        | Was data saturation discussed?                                           | 4        | During the study, saturation was achieved after 38 interviews. To accomplish maximum variation, interviews continue with further patients to ensure that no new aspects emerged.            |
| 23.                                             | Transcripts returned   | Were transcripts returned to participants for comment and/or correction? | 4        | All interview audio was recorded and transcribed verbatim with participants' permission, after which interview transcripts were sent to participants via email for comments or corrections. |
| <b>Domain 3:<br/>analysis and<br/>findingsz</b> |                        |                                                                          |          |                                                                                                                                                                                             |



| No            | Item                           | Guide questions/description                                 | Page No. | Relevant text from manuscript                                                                                                                                                                          |
|---------------|--------------------------------|-------------------------------------------------------------|----------|--------------------------------------------------------------------------------------------------------------------------------------------------------------------------------------------------------|
| Data analysis |                                |                                                             |          |                                                                                                                                                                                                        |
| 24.           | Number of data coders          | How many data coders coded the data?                        | 4        | The data was analyzed by a team of three trained qualitative researchers based on a qualitative content analysis method                                                                                |
| 25.           | Description of the coding tree | Did authors provide a description of the coding tree?       | 4        | The team developed a structured codebook that included inductively derived codes that represented ideas that emerged from the data as well as deductively selected categories to organize the dataset. |
| 26.           | Derivation of themes           | Were themes identified in advance or derived from the data? | 5        | No. each cluster's statements were scrutinized and compared to find the central component and then fused into categories (theme).                                                                      |
| 27.           | Software                       | What software, if applicable, was used to manage the data?  | 4        | No                                                                                                                                                                                                     |
| 28.           | Participant checking           | Did participants provide feedback on the findings?          | 5        | Yes                                                                                                                                                                                                    |
| Reporting     |                                |                                                             |          |                                                                                                                                                                                                        |

| No  | Item                         | Guide questions/description                                                                                                                 | Page No. | Relevant text from manuscript                                                                                                                                                                                                                 |
|-----|------------------------------|---------------------------------------------------------------------------------------------------------------------------------------------|----------|-----------------------------------------------------------------------------------------------------------------------------------------------------------------------------------------------------------------------------------------------|
| 29. | Quotations presented         | Were participant quotations presented to illustrate the themes / findings?<br>Was each quotation identified? e.g. <i>participant number</i> | 5-10     | "Results" section                                                                                                                                                                                                                             |
| 30. | Data and findings consistent | Was there consistency between the data presented and the findings?                                                                          | 5-10     | "Results" section                                                                                                                                                                                                                             |
| 31. | Clarity of major themes      | Were major themes clearly presented in the findings?                                                                                        | 5        | The issues and connections are extracted from all interview data and summarized in the conceptual model, which was composed of healthcare workers' anxiety during different stages of epidemics and related drivers and mediators (Figure 2). |
| 32. | Clarity of minor themes      | Is there a description of diverse cases or discussion of minor themes?                                                                      | 5-10     | "Results" section                                                                                                                                                                                                                             |

# BMJ Open

## Drivers and mediators of healthcare workers' anxiety in one of the most affected hospitals by COVID-19: a qualitative analysis.

|                                 |                                                                                                                                                                                                                                                                                                                                                             |
|---------------------------------|-------------------------------------------------------------------------------------------------------------------------------------------------------------------------------------------------------------------------------------------------------------------------------------------------------------------------------------------------------------|
| Journal:                        | <i>BMJ Open</i>                                                                                                                                                                                                                                                                                                                                             |
| Manuscript ID                   | bmjopen-2020-045048.R1                                                                                                                                                                                                                                                                                                                                      |
| Article Type:                   | Original research                                                                                                                                                                                                                                                                                                                                           |
| Date Submitted by the Author:   | 28-Jan-2021                                                                                                                                                                                                                                                                                                                                                 |
| Complete List of Authors:       | Fang, Mengling; The Central Hospital of Wuhan, Department of Cardiology<br>Xia, Bo; The Central Hospital of Wuhan, Operating Room<br>Tian, Tian; The Central Hospital of Wuhan, Department of Digestion<br>Hao, Yan; The Central Hospital of Wuhan, Department of Digestion<br>Wu, Zhenghao; Wuhan Union Hospital, Department of Breast and Thyroid Surgery |
| <b>Primary Subject Heading</b>: | Qualitative research                                                                                                                                                                                                                                                                                                                                        |
| Secondary Subject Heading:      | Occupational and environmental medicine, Qualitative research, Mental health, Health services research                                                                                                                                                                                                                                                      |
| Keywords:                       | COVID-19, MENTAL HEALTH, Quality in health care < HEALTH SERVICES ADMINISTRATION & MANAGEMENT, QUALITATIVE RESEARCH                                                                                                                                                                                                                                         |
|                                 |                                                                                                                                                                                                                                                                                                                                                             |

SCHOLARONE™  
Manuscripts



I, the Submitting Author has the right to grant and does grant on behalf of all authors of the Work (as defined in the below author licence), an exclusive licence and/or a non-exclusive licence for contributions from authors who are: i) UK Crown employees; ii) where BMJ has agreed a CC-BY licence shall apply, and/or iii) in accordance with the terms applicable for US Federal Government officers or employees acting as part of their official duties; on a worldwide, perpetual, irrevocable, royalty-free basis to BMJ Publishing Group Ltd ("BMJ") its licensees and where the relevant Journal is co-owned by BMJ to the co-owners of the Journal, to publish the Work in this journal and any other BMJ products and to exploit all rights, as set out in our [licence](#).

The Submitting Author accepts and understands that any supply made under these terms is made by BMJ to the Submitting Author unless you are acting as an employee on behalf of your employer or a postgraduate student of an affiliated institution which is paying any applicable article publishing charge ("APC") for Open Access articles. Where the Submitting Author wishes to make the Work available on an Open Access basis (and intends to pay the relevant APC), the terms of reuse of such Open Access shall be governed by a Creative Commons licence – details of these licences and which [Creative Commons](#) licence will apply to this Work are set out in our licence referred to above.

Other than as permitted in any relevant BMJ Author's Self Archiving Policies, I confirm this Work has not been accepted for publication elsewhere, is not being considered for publication elsewhere and does not duplicate material already published. I confirm all authors consent to publication of this Work and authorise the granting of this licence.

1  
2  
3  
4  
5 **Drivers and mediators of healthcare workers' anxiety in one of**  
6 **the most affected hospitals by COVID-19: a qualitative analysis.**  
7  
8  
9

10 **Mengling Fang** <sup>b,1</sup>, **Bo Xia** <sup>c,1</sup>, **Tian Tian** <sup>d,1</sup>, **Yan Hao** <sup>d</sup>, **Zhenghao Wu** <sup>a,\*</sup>

11  
12 <sup>a</sup>: Department of Breast and Thyroid Surgery, Union Hospital, Tongji Medical  
13 College, Huazhong University of Science and Technology, Wuhan, China.

14  
15 <sup>b</sup>: Department of Cardiology, The Central Hospital of Wuhan, Tongji Medical  
16 College, Huazhong University of Science and Technology, Wuhan, China.

17  
18 <sup>c</sup>: Operating Room, The Central Hospital of Wuhan, Tongji Medical College,  
19 Huazhong University of Science and Technology, Wuhan, China.

20  
21 <sup>d</sup>: Department of Digestion, The Central Hospital of Wuhan, Tongji Medical College,  
22 Huazhong University of Science and Technology, Wuhan, China.

23  
24 <sup>1</sup>: Mengling Fang, Bo Xia, and Tian Tian are joint first authors  
25  
26  
27  
28  
29

30 **\*: Corresponding Authors:**

31  
32 Zhenghao Wu (421910799@qq.com)

33  
34 Department of Breast and Thyroid Surgery, Union Hospital Affiliated to Tongji  
35 Medical College, Huazhong University of Science and Technology, 1277 Jiefang  
36 Avenue, Wuhan, Hubei, 430022  
37  
38  
39  
40  
41  
42  
43  
44  
45  
46  
47  
48  
49  
50  
51  
52  
53  
54  
55  
56  
57  
58  
59  
60

Word count: 3739

## Abstract

**Objectives:** To report driving and mediating factors of healthcare workers' anxiety during the COVID-19 pandemic.

**Design:** Qualitative in-depth interview study

**Setting:** The Central Hospital of Wuhan, Tongji Medical College, Huazhong University of Science and Technology, Wuhan, China.

**Participants:** 53 healthcare workers who were or were not diagnosed with COVID-19 infection.

**Results:** During the COVID-19 pandemic, healthcare workers did not have sufficient psychological preparation initially and then suffered from severe anxiety and apprehension in the peak stage, no matter whether infected by SARS-CoV-2. These negative emotions were exacerbated by four drivers, including infection risk, supplies, isolations, and media. As the epidemic was gradually under control, healthcare workers experienced less anxiety from the factors above but became concerned about low financial status. In order to reduce anxiety, healthcare workers distracted attention from dangers through personal entertainment and religious belief, and concentrated on treatments for patients. Furthermore, assistance from other people, including colleagues, families, friends, patients, and society, defended healthcare workers from anxiety.

**Conclusions:** Personal and social supports can relieve healthcare workers' anxiety to some extent during different stages of the epidemic. Both protective equipment and financial allowance benefit healthcare workers to focus on patients' care, although the latter matters most as the epidemic is under control.

## Strengths and limitations of this study

- The study captured the mental health of healthcare workers during the different stages of from COVID-19 epidemic in Wuhan to the global pandemic.
- All participants worked in the Central Hospital in Wuhan (CHW), where six healthcare workers passed away due to the COVID-19 infection.
- This study included participants with multiple occupations, including doctors, nurses, administrative and support staff, some of whom had COVID-19 infection history, thus fully representing healthcare workers' views.
- Although we randomly sampled healthcare workers and successfully invited most of them for interviews, some personnel refused to participate.
- Due to social distancing and city lockdown, many participants could not be directly interviewed through a face-to-face way, which is less convenient to convey emotions.

## Introduction

The coronavirus disease 2019 (COVID-19) pandemic is a global health threat and is the most massive pandemic since the severe acute respiratory syndrome (SARS) in 2003. The outbreak was first identified in Wuhan, China, in December 2019, with early cases reported here [1]. Until August 2020, the total number of cases exceeded 20 million, and the number of deaths exceeded 800 thousand in the world [2].

Central Hospital in Wuhan (CHW) played a significant role in defending the Wuhan people from the COVID-19 invasion and sacrificed tremendously during the epidemic outbreak (Figure 1). Cases in the initial cluster were associated with a seafood market in Wuhan and received treatment in the nearby houhu district of the Central Hospital in Wuhan (CHW) [3]. Before the new coronavirus was discovered, healthcare workers in CHW were fully exposed to infected patients without enough cognition and sufficient personal protective equipment (PPE). On 30th Dec 2019, a patient's test report, which showed a high confidence level for SARS coronavirus infection, was spread to the public by Dr. A in CHW, who thus was called a "whistleblower". Unfortunately, Dr. A was diagnosed with COVID-19 infection later and passed away after five days. Similar to Dr. A, another five doctors in CHW passed away because of COVID-19 associated complications until now, and they are all honored as heroes in China.

Since December 2019, healthcare workers in Wuhan, China, had to treat patients with COVID-19 infection with increased workload and infection risk. SARS-CoV-2 has a strong transmission ability in Wuhan before travel restrictions when the virus median daily reproduction number ( $R_t$ ) was estimated to be 2.35 [4]. In a Wuhan hospital case series, a super-spreader was confirmed to transmit SARS-CoV-2 to more than 10 physicians and nurses in the department [5]. As the epidemic progressed and cases increased, healthcare workers were recognized as a group with high infection risk. Until 8th Mar 2020, 1496 health care workers were diagnosed with laboratory-confirmed COVID-19 infection in Wuhan, China, a large part of whom worked in CHW [3]. Healthcare workers had shown professionalism and care, but their physical and psychological health was under pressure when working with high infection risk.

Multiple studies have searched for the mental health of hospital staff through the method of questionnaires. It was reported that more than half of health care workers experienced depression and distress symptoms [6]. Nurses, women, frontline staff had worse mental health than others [6, 7]. Social support could help healthcare workers with decreased anxiety and stress and improved sleep quality [8]. In the above quantitative research using questionnaires, the respondents are only allowed to answer predefined questions. For individual participants, questions not covered by the questionnaire might be highly relevant and therefore missed. Moreover, questionnaires do not allow personalized thoughts and feelings on the subject [9, 10]. Therefore, qualitative research constitutes a feasible complement to the in-depth exploration of



1  
2  
3 the phenomenon.  
4

5 To understand the obstacles that healthcare workers encounter when performing epidemic  
6 control tasks, we conducted in-depth interviews using qualitative design. This study aimed to  
7 make an in-depth exploration of (a) describe the mental status of healthcare workers during  
8 COVID-19; (b) identify main factors upsetting healthcare workers; (c) characterize how the  
9 medical staff is relieved from pressure.  
10  
11  
12

## 13 14 **Method**

### 15 16 **Design and patients**

17 Qualitative research was conducted on workers at the Central Hospital of Wuhan (CHW)  
18 between 16<sup>th</sup> May, and 1<sup>st</sup> Jul 2020. Study participants were eligible if they worked in the CHW  
19 during the epidemic. All kinds of workers in the CHW, including doctors, nurses, administrative  
20 and support staff, were sampled for the study. By using these separate groups, we aimed to  
21 improve the trustworthiness of the data.  
22  
23  
24  
25  
26

27 Participants were selected through purposeful maximum variation sampling regarding age,  
28 sex, occupation, and working position for patients to accomplish full coverage. The number of  
29 participants was determined based on “saturation”, a sense of closure that occurs when data  
30 collection ceases to provide important new information and patterns in the data become  
31 evident. During the study, saturation was achieved after 38 interviews. To accomplish maximum  
32 variation, interviews continue with further participants to ensure that no new aspects emerged.  
33 In total, 53 healthcare workers completed the full research, with a participation rate of 53/76  
34 (69.7%) based on the total number of individuals whom we invited to interview. All participants  
35 who accepted our invitation finished the full interview. To fully inform participants of all relevant  
36 information and risks of this research, formal informed consent was provided to all participants  
37 before the interview. At the beginning of the interview, all participants acknowledged that they  
38 had read this informed consent and fully understood this research.  
39  
40  
41  
42  
43  
44  
45

46 This study was conducted in accordance with the Declaration of Helsinki. All of the participants  
47 agreed to participate. The Central Hospital of Wuhan Ethics Committee approved the study  
48 procedures.  
49

### 50 51 **Data collection**

52 All researchers participated in the interview. Researchers possessed experience in qualitative  
53 interviews and underwent training by tutors with psychological consultant certificates issued by  
54 the Ministry of Human Resources and Social Security of China. They also worked in the frontline  
55 during the COVID-19 pandemic and empathized with other healthcare workers. Therefore, the  
56 researcher was able to carry out interviews independently. Data were gathered by  
57 semistructured interviews mostly through phone or internet communication tools such as  
58  
59  
60

1  
2  
3 Wechat and QQ due to social distancing. All interview audio was recorded and transcribed  
4 verbatim with participants' permission. Demographic data included age, gender, departments,  
5 professional titles, educational background, marriage status, occupation, occupation, working  
6 life, and COVID-19 infection history were collected.  
7  
8

9  
10 The interview guide included questions regarding the experience of living and working during  
11 the pandemic was designed with the help of professional qualitative researchers and distributed  
12 to interviewers with associated experience (Supplementary file 1). Examples of initial questions  
13 were: "What did you experience during the epidemic?", "How did you feel when you heard of  
14 your colleagues' death?", "Has something changed after epidemic?". When needed, follow-up  
15 questions were posed. The interviews were carried out by at least one interviewer and lasted for  
16 10–60 minutes. Six interviews were repeated for more than one time to clarify critical questions.  
17  
18

### 19 20 21 **Data analysis**

22 The data was analyzed by a team of three trained qualitative researchers based on Hsieh's  
23 conventional content analysis method [11]. Hsieh's approach is generally used with a study  
24 design to describe a phenomenon, healthcare workers' emotional reactions during COVID-19  
25 pandemic in this case. The advantage of Hsieh's approach is gaining direct information from  
26 study participants without imposing preconceived categories or theoretical perspectives.  
27 Researchers immerse themselves in interview data content to allow new insights to emerge [11].  
28 First, the interviews were read through several times in order to become acquainted with the  
29 content. They were then reread systematically to identify meaning units, such as words or text  
30 segments and patterns of meaning, which were also marked with a preliminary code. The team  
31 developed a structured codebook that included inductively derived codes that represented ideas  
32 that emerged from the data as well as deductively selected categories to organize the dataset.  
33 Second, the investigators conducted multiple rounds of codebook revision and interrater  
34 reliability testing until a minimum pooled kappa value greater than 0.8 was achieved by all  
35 coders to ensure the clarity of coding definitions. Periodic discussions among the investigators  
36 ensured consistency of coding and helped us reach an agreement on codebooks. Third, those  
37 segments marked with similar codes were brought together and formed meaningful clusters, as  
38 far as possible the actual words expressed by the informants were used. Next, each cluster's  
39 statements were scrutinized and compared to find the central component and then fused into  
40 categories. The final categories were then compared to avoid obvious overlapping, and in the last  
41 step, the categories were compared and analyzed to reveal possible relationships or hierarchies  
42 between them.  
43  
44

45 In addition, all participants are native Chinese speakers, so all interviews are conducted in  
46 Chinese. To cite the interviewees' words in this paper and completely convey their semantics,  
47 investigators and native English speakers cooperatively translated these excerpts to English. This  
48 study is reported in accordance with the Consolidated criteria for reporting qualitative research  
49  
50  
51  
52  
53  
54  
55  
56  
57  
58  
59  
60

(COREQ) checklist [12].

### **Trustworthiness**

Trustworthiness is the standard that constitutes the rigor of qualitative research [13]. During the interviews, similar questions were put in different ways to ensure that the informant's view was correctly captured. Then, coauthors reviewed and commented on relevant interview transcripts separately and discussed their findings through continuous communications. To promote reflexivity during analysis meetings, team members discussed their insights, perceptions, and potential biases to make sure they were accounted for in data interpretation [13]. Then interpreted results were sent to participants via email for comments or corrections to ensure that participants' opinions were accurately reflected in the data and to check the consistency between the results of the researchers and the actual intentions of the participants [14]. Dependability is achieved through accurate records and in-depth descriptions of the methods used in the research. In terms of transferability, we used a detailed description method to ensure sufficient and accurate contextual information. The findings and conclusions can be transferred to other studies with similar situations. The quotes from the interviews are also provided as examples to clarify the explicated meanings and establish validity.

### **Patient and public involvement**

No patients were involved in this study. Summary results were sent to participants via email before publication for feedback and comment.

## **Result**

Altogether, 53 healthcare workers were interviewed. Their ages ranged from 23 to 63 years (Mage = 39 years), and 32 (60.4%) participants were women. 18 healthcare workers were infected by COVID-19, and 40 participants treated COVID-19 patients in the frontline. All the participants were working in the Central Hospital of Wuhan during the pandemic (Table 1).

The issues and connections were extracted from all interview data and summarized in the conceptual model, which was composed of healthcare workers' anxiety during different stages of pandemic and related drivers and mediators (Figure 2).

### **Healthcare workers' anxiety during different stages of the epidemic**

Healthcare workers experienced a process of dynamic changes in emotions during the whole epidemic, which was divided into three stages.

In the initial stage of the epidemic, most participants experienced few intrusive and frightening thoughts about their clinical work because they did not understand the severity of COVID-19. The Wuhan government released that "No clear evidence of human-to-human transmission was found. Therefore, this epidemic is preventable and controllable" in January

1  
2  
3 2020, which made some participants lose their vigilance. However, participants from  
4 departments such as respiratory, infection, and emergency departments were more likely to be  
5 exposed to pneumonia patients and noticed a new kind of emerging respiratory disease.  
6  
7 Therefore they were more vigilant and worried ahead of other healthcare workers.  
8

9  
10 "At the beginning of the outbreak, I felt nothing because it had not happened besides before. I  
11 was not scared until people around me were infected" -26

12  
13 "In the early stage of the epidemic, the emergency department staff was all transferred from  
14 other departments. The team leader was isolated because of the abnormal CT examination results,  
15 and she only taught me one day. Other nurses without enough professional skills often sat beside  
16 the consultation desk outside, and only I worked in the rescue room. Everyone was lazy and didn't  
17 want to do anything." -29

18  
19 "Hmmm... In December, patients with similar symptoms (to COVID-19) appeared in our  
20 department. At that time, we were quite anxious. Although the number of cases increased in  
21 January, people from other departments came to support us, and more protective equipment was  
22 provided to us, so the situation is much better. By this time, we became accustomed to this state."  
23 -31 (Nurse, Respiratory department)

24  
25  
26  
27 As the epidemic progresses to its highest peak, almost all general practitioners in the hospital  
28 experienced infection or death around, including patients, colleagues, and even themselves.  
29 They began to realize the seriousness and severity of the epidemic. Most of our interviewees  
30 overflowed intense negative emotions such as "desperation", "depression", "fear" and "anxiety"  
31 after they heard or witnessed their colleague hurt by COVID-19 and worried about their health.  
32

33  
34 "So desperate, there was definitely a desperate mood, most desperate in 6th Feb (when Dr. A  
35 passed away)... it's not suitable for elaboration... such famous ones are not cured. If me..." -41

36  
37 "At first, I didn't know it was COVID-19, so I wasn't afraid. Later, after a large number of patient  
38 cases were reported on the internet, I began to get scared." -50

39  
40 "When I heard that the doctor in our hospital died, I was scared and wanted to cry. (silence). I  
41 don't know how to describe it." -13

42  
43 "Very unreal feeling, kind of unbelievable, after all, they (doctors who died of COVID-19) were  
44 working with me before. I can't believe this news is true!" -15

45  
46 "My family members were very worried about me and called me every day. Although I worried  
47 about myself, I was more scared about whether my family members would be infected." -36

48  
49 As time went by, people gradually recovered to calmness and pursued the tranquillity of  
50 post-virus life. Most frontline workers had gradually adapted to this state of work, with  
51 increasing cases being cured, and good news reported by the media. However, after the ending  
52 of the Wuhan lockdown and the opening of outpatient service, the number of patients had  
53 dropped sharply than those before the epidemic, so healthcare workers' wages also decreased,  
54 which stressed participants who need to repay the loans. However, some participants were  
55 unwilling to mention what happened during the COVID-19 epidemic and committed to new  
56 careers to minimize anxiety and pretend fearlessness.  
57  
58  
59  
60

1  
2  
3 “I’m very sorry. (silence) My comrades fighting side by side are gone forever. Strongly grieved for  
4 their families! I wanted to do something for them, so I participated in donations and contacted  
5 related foundations.” -4

6  
7 “About the occupation, the COVID-19, others’ death... I didn’t think deeply. Not dare to. I just  
8 wanted to have a good day every day.” -16  
9

10  
11 Nevertheless, several interviewees didn't seem to experience any emotional fluctuations from  
12 beginning to end, probably due to personal temperament and working experience.

13  
14 “When doctors in our hospital passed away, I was not afraid at all. I only had two choices, either  
15 survive or die. I didn’t care.” -42 (Infected doctor)

16  
17 “I experienced many ups and downs in my whole life. This epidemic was only one of the  
18 difficulties. I was not afraid, because I participated in the fight for SARS in Guangzhou in 2003” -17  
19 (Second-line doctor)  
20  
21

## 22 **Drivers of healthcare workers' anxiety**

23  
24 This category was developed to capture the underlying causes of participants' anxiety during  
25 different epidemic stages in around five themes.

26  
27 **Infection Risk**-SARS-CoV-2 is spread mainly by aerosolized droplets expelled during coughing,  
28 sneezing, or breathing with a robust transmission ability [4]. Healthcare workers have been  
29 particularly hard hit by SARS-CoV-2, with high reported infection rates from Italian data. Even a  
30 high percentage of asymptomatic healthcare workers were reported to test positive for  
31 SARS-CoV-2 according to PCR results [15]. Their anxiety was related to, and triggered by,  
32 examinations and treatments to confirmed and suspected patients, as there was always a  
33 potential infection risk. After getting off work and staying away from patients, the anxiety level  
34 temporarily decreased, but it increased again close to the next day at the hospital. Participants'  
35 anxiety for infection risk mainly occurred at the peak of the epidemic and gradually disappeared  
36 as the epidemic was controlled.  
37  
38

39  
40 “At that time, I was crying with my roommate at home every day. In fact, I got only an ordinary  
41 lung infection.” -19  
42

43  
44 “Everyone could be infected, and I was no exception” -25

45  
46 “Scared! I was really terrified! I was really afraid of getting infected. The isolation wards were full  
47 of COVID-19 confirmed patients” -3  
48  
49

50  
51 **Supplies**-After the outbreak of COVID-19, the government imposed a strict lockdown in  
52 Wuhan, and many living supplies were difficult to obtain. Furthermore, the healthcare  
53 workforce's need for personal protective equipment (PPE) such as surgical masks and isolation  
54 gowns outpaced the supply in the early onset of COVID-19. Adequate supplies of PPE were  
55 identified as an effective protective strategy for the psychological distress by emerging virus  
56 outbreak on healthcare workers [16]. Participants without enough PPE worried about high  
57 infection risk for themselves and their families. Therefore, communities and governments  
58  
59  
60

1  
2  
3 provided adequate supplies to alleviate the shortage to minimize clinical staff burden.  
4

5 "After job transfer from respiratory medicine to CCU, no one cared about me. Totally  
6 helplessness. I couldn't get living supplies such as rice and noodles and buy food (because of  
7 lockdown in Wuhan)" -51  
8

9 "Living and protective supplies are sufficient. When everyone in the hospital was scrambling for  
10 supplies, a friend knew my situation and sent me two food boxes with bread and milk. I thought  
11 Wuhan was quite lovely at that time." -34  
12

13 "Because of fundraising from all over the country and even around the world, healthcare  
14 workers including me were not short of living supplies, but my family still lacked supplies. During  
15 this period, I was more worried about my family than myself" -15  
16  
17

18 **Isolation**-WHO recommended that healthcare workers with suspected COVID-19 who present  
19 with mild or moderate symptoms should be encouraged to stay home and away from the  
20 workplace during illness [17]. It was reported that individuals, including healthcare workers who  
21 self-isolated at home, suffered from increased anxiety and stress [18]. Participants felt "so lonely  
22 as if abandoned by the world" and "be seemingly treated like a criminal" during the quarantine.  
23 In contrast to depression brought about by isolation, some participants prefer to confront the  
24 patients and continue the clinical work despite the high risk of infection.  
25  
26  
27  
28

29 "At the beginning of the epidemic, I was under a lot of psychological pressure. There was  
30 something wrong with the CT examination of the roommate's lungs, so I was also isolated at  
31 home"-49  
32

33 "I'm afraid of isolation. No matter how good the environment is, I can't accept isolation. I am  
34 willing to work in the hospital rather than being isolated. In order not to be isolated, it is necessary  
35 to rest well and boost immunity." -22  
36  
37

38 **Media**-Although WHO has produced guidance for opinion-makers and the media on how to  
39 describe the outbreak, few local and social media strictly obeyed them in the initial stage of the  
40 epidemic yet, which stressed healthcare workers deeply [19]. For example, some media  
41 presumed the possibility of healthcare workers having or spreading COVID-19 rather than  
42 highlighting the effectiveness of preventive measures, and therefore some people worried about  
43 contact with their neighbors who worked in the hospital.  
44  
45  
46  
47

48 In addition, many healthcare staff learned about the infection or death of their colleagues  
49 through social media, which made them mourn for the loss and also scared of being infected. An  
50 interviewee quoted a Chinese colloquialism to express her sorrow: *The fox mourns over the*  
51 *hare's death.*  
52  
53

54 "During the epidemic, I lived in a hotel close to the hospital rather than at home. The  
55 management company in my community was not willing to allow me to enter it after hearing that  
56 many doctors in our hospital were infected." -37  
57

58 "When I was treated for COVID-19, all kinds of bad news appeared, especially which doctors in  
59 our hospital passed away. (Appeared surprised) I tried not to watch bad news, but It was  
60

1  
2  
3 impossible to block social media from all my friends. After reading them, I was afraid that I would  
4 not be cured. Therefore, when the doctor told me to use the immunity-enhancing drugs at my own  
5 expense, and I said: 'use them, no matter how much they cost.'" -53  
6  
7

8  
9 **Financial Status**-During the peak of the epidemic, healthcare workers received an allowance  
10 from the government for treating COVID-19 patients. The government reimbursed people  
11 infected by COVID-19 in China for all treatment costs, and infected healthcare staff can also claim  
12 workers' compensation insurance. Therefore, few healthcare workers were anxious about their  
13 financial status during the epidemic's peak. However, after the ending of the Wuhan lockdown  
14 and the opening of outpatient service, participants complained that salaries were not satisfied  
15 after the epidemic was under control because the government canceled allowance and patients  
16 unwill to visit the hospital for fear of infection risk, which decreased hospital profits. Some  
17 interviewees also felt that their efforts and sacrifice had not been reasonably compensated and  
18 eager to obtain adequate financial rewards.  
19  
20  
21  
22

23  
24 "Will my salary be raised in the future? It is too low to support myself now" -30

25 "But I think we are really the cheapest labor force because I met my classmates on Sunday, they  
26 worked in Didi (a taxi company) and drove medically equipped vehicles during the epidemic? They  
27 earned more than 100,000 yuan (\$14,000) in a single week! They really made more than 100,000  
28 yuan! But how much for us? really cheap labor!" -21  
29  
30  
31

### 32 **Self mediators of healthcare workers' anxiety**

33 In the face of high occupational risk, healthcare workers developed their own way to defend  
34 themselves from anxiety and depression.  
35  
36

37 **Occupational attitude**-Most healthcare staff decided to take up medicine as a career tended to  
38 endorse altruistic reasons (working with people, helping others) rather than the possibility to  
39 achieve high social status and financial stability [20]. Under the threat of COVID-19, participants  
40 identified the desire to rescue patients as a motivation for themselves.  
41  
42

43 "The doctors' duty is to heal the wounded and rescue the dying" -41

44 "I never thought of resignation and still have full-hearted enthusiasm. Many colleagues returned  
45 to work immediately after recovery from COVID-19" -33

46 "Everyone has their own responsibilities in their positions. I have a clear conscience only if I do  
47 my best"-17  
48  
49

50  
51 **Fitness**-A high level of cardiorespiratory fitness caused by prior exercise training reduces  
52 all-cause mortality and may confer some protection against COVID-19 [19]. Two infected  
53 participants kept in satisfactory physical condition before and had a strong belief in being cured  
54 of COVID-19. In addition, patients with younger age were identified with a good prognosis, which  
55 boosted some young participants [21].  
56  
57

58  
59 "There is no special medicine for COVID-19. It's totally dependent on your immunity. I always  
60

exercised before, so I wasn't injected with immunoglobulin while being infected.” -28

“I limited energy intake to lose weight before. However, my workload suddenly increased, and I need to maintain a proper diet to supplement nutrition after the COVID-19 epidemic.”-52

**Entertainment**-Entertainment such as videos, computer games, and other personal hobbies at home has considerable potential for relieving healthcare workers from reality pressure. Several interviewees were addicted to personal hobbies to escape from the disturbance of work fatigue and anxiety for relatives' health.

“My boyfriend gifted me a microphone, and I sang at home. Later, I felt that I couldn't stand it and applied for a photography class at home. There is always something to do, in case I thought so much.”-14

“Eat, drink, and sleep when I should. Watch TV drama or play video games when I'm free.”-11

“When I was hospitalized, I played 'Honor of Kings' (a mobile MOBA game) every day.”-32

**Religion**-Only one participant sought help from religion to stay away from negative moods under the pressure of frequent infections of companions. During the pandemic, places of worship such as temples, churches, synagogues, and mosques were also closed in Wuhan, which interrupted most of the religious activities. Therefore, she sought spiritual peace by “copying the Buddhist sutras at home”.

“After I got off work, I copied the Buddhist sutras at home. The power of religious belief has always supported me”-29

### **Interpersonal mediators of healthcare workers' anxiety**

Confronting patients' and colleagues' successive deaths, many participants experienced heavy psychological pressure and sought help from other people, including colleagues, families, friends, patients, and society (Table 2).

During working hours, colleagues companions played a significant role in relieving loneliness and horror. Participants “rushed to the front” similar to soldiers and treated their colleagues as comrades-in-arms. Some infected interviewees experienced a dramatic change of identity from doctors/nurses to patients and desired more psychological support from their health carers also colleagues. In addition, patients also expressed their gratitude to some participants for their dedication. After getting off work, most participants felt less anxious and depressed by communicating with their families and friends, who always encouraged them to hold on. Participants' families relieved them of the negative emotional state by encouragement, care, and comfort. Sometimes, participants were unwilling to share their anxiety with their families “because the family would be more worried and sleepless”. Furthermore, the government and hospital provided living and protective materials “as much as possible”, which were indispensable for living during epidemic and lockdown in Wuhan.



## Discussion

Our research divided the COVID-19 epidemic-pandemic experienced by healthcare workers into three stages and tracked the dynamic changes of their mental state. While these emotions may be mitigated or exacerbated by the working experience, environment, and health status, participants' reports suggest these experiences are pervasive. Ardebili et al. also showed how emotions and feelings were highly conditioned by the time of evolution of the pandemic [22]. These authors developed a three-level model: early exposure, with high levels of fear, anxiety, and loss of control; crisis peak, featured by feelings of helplessness, hopelessness, and depression; and long-term effects, with symptoms of post-traumatic stress disorder (PTSD) and reappearance of fears. Compared to Ardebili's model, we found that in the early exposure most participants had no sense about the COVID-19 epidemic, and thus experienced few negative emotions. However, they suffered tremendously psychological pain in the crisis peak as the massive infections and deaths of patients and colleagues. A faster emotional shift was observed in our research than in other reports.

To date, most reported qualitative researches focused on the emotional experiences of healthcare workers during the peak of the COVID-19 pandemic [23-25]. All these researches found that the pandemic outbreak led to a series of negative emotions, such as depression, anxiety, and fear [23-25]. However, these psychological symptoms were attributed to different driving factors in different studies. Some participants were plagued by job challenges, such as inappropriate clinical scheduling, inadequate capacities for difficult tasks, and insufficient cooperation with community workers [24, 25]. They also sympathized with the patients' suffering and felt upset for incapability to cure the dying patient [23, 25]. Zhang et al. [26] reported that nurses experienced negative emotional reactions in the initial period of home isolation. During social distancing and isolation, residents felt psychological and emotional loss, criticized government communication, adhered to social distancing guidelines, and uncertain about social reintegration and the future [27]. In addition, viral infection risk and shortage of protective devices distressed many healthcare workers [22, 23, 25]. Except for the above factors, our conceptual model also illustrates media's role in triggering emotional responses.

Few studies explored healthcare workers' emotional experiences in the late period of the epidemic. Notably, the anxiety level of participants didn't significantly decrease with the complete control of the epidemic in Wuhan, which attributed to not only PTSD but also poor post-epidemic financial status. Most participants explicitly or impliedly expressed their concerns and dissatisfaction with incomes, which was never mentioned in other researches. Therefore, strategies to help healthcare workers overcome challenges and prevent the primary care system from being overwhelmed are continuously needed in the long fight against COVID-19. Health authorities and institutional leaders were expected to provide both mental and material support to healthcare workers.

1  
2  
3  
4 It was reported that high-risk groups of mental health symptoms were nurses, women,  
5 frontline health care workers, and those working in Wuhan, China, who accounted for 35% of  
6 interviewees in this study [6]. Notably, most of our interviewees never worked in respiratory,  
7 infection, emergency, intense medicine, and other related departments before the COVID-19  
8 pandemic. Therefore they experienced more perceived stress and less social support when  
9 treating COVID-19 patients [28]. In addition, our research population came from a particular  
10 hospital in Wuhan, where the COVID-19 epidemic first broke out, and more medical workers  
11 here passed away due to infection than all other hospitals. Chinese and even the world media  
12 focused on workers' status in this hospital during the epidemic. Due to tremendous pressure  
13 from multiple factors, healthcare workers might undergo more serious anxiety than those of  
14 other hospitals. Thereby, they represent the majority of healthcare workers worldwide who are  
15 under severe psychological stress during the pandemic.  
16  
17  
18  
19  
20  
21

22 Our findings extend research on mental health in the medical workplace during a public crisis  
23 and provide a view of death anxiety directly from the perspective of those who experience it.  
24 Death anxiety is a multidimensional construct involving cognitive, emotional, and experiential  
25 aspects [29]. It was reported that physicians' death anxiety for patients did not relate to decision  
26 making during clinical treatment but guilt or doubt after a patient's death [30]. However, few  
27 studies focused on physicians' death anxiety for their colleagues, which had a huge negative  
28 impact on health professionals. Participants in our study revealed significantly declined working  
29 enthusiasm and efficiency due to colleagues' infection and death. When healthcare workers saw  
30 their colleagues bearing the hardship, they were inspired to have greater solidarity and cohesion.  
31 As for some participants infected by COVID-19, they also reported concerns regarding their fear  
32 of dying alone and being separated from their loved ones, fear of infecting their families, friends,  
33 or colleagues, and fear of stigmatization [22].  
34  
35  
36  
37  
38  
39

40 Healthcare providers had multiple ways to recover from affliction, not only by  
41 self-management strategies but also by social support systems, including colleagues, families,  
42 friends, patients, and society. With logistical support from their hospital and encouragement  
43 among colleagues, they had a sense of safety and felt they were not alone [23]. In addition, the  
44 local government and hospitals had predicted high mental pressure among healthcare workers in  
45 advance and offered professional psychological counseling and related questionnaires to them  
46 [31]. Nevertheless, no participants expressed their benefits from these measures, indicating  
47 these psychological intervenes were invalid and insufficient to alleviate the psychological issues.  
48  
49  
50  
51  
52

53 Some limitations need to be considered when interpreting our findings. First, the timing of  
54 administering the interviews might affect the results. The participants likely had less anxiety  
55 because they were just assured that they would not be infected with COVID19 after the  
56 well-controlled epidemic in Wuhan. Second, all participants were voluntary to take part in the  
57 research. Although we randomly sampled healthcare workers and successfully invited most of  
58 them to interview, some personnel who suffered severely would be less inclined to participate.  
59  
60

1  
2  
3 Finally, due to social distance and city lockdown, many participants could not be directly  
4 interviewed through a face-to-face way, which is less convenient to convey emotions. In order to  
5 catch participants' faces and actions, video calls and online conference app were recommended  
6 if permitted by interviewees.  
7  
8

## 9 10 **Conclusion**

11 Our research reports a comprehensive conceptual model to describe the cause and regulation of  
12 anxiety among healthcare workers at different stages of the pandemic and raises problems  
13 about the protective measure for psychology and physiology. Although the government and  
14 society provide materials and spirit support as much as possible, most healthcare workers still  
15 felt neglected and anxious about infection risk and income levels. Psychological intervention and  
16 personal protection for healthcare workers need to be immediately carried out, especially in the  
17 districts and hospitals affected seriously by COVID-19. Healthcare workers in the  
18 epidemic-controlled district have less infection risk but also lower-income, so they benefited  
19 more from financial compensation.  
20  
21  
22  
23  
24

25  
26  
27 MLF, BX and TT contributed equally to this work.  
28

29 **Author Contributions:** MLF and ZHW conceived of the study and analysis plan. MLF, BX, TT and  
30 YH collected data. MLF and ZHW analyzed the data. ZHW drafted the conceptual model. MLF and  
31 ZHW wrote the first draft of the manuscript. All authors contributed to the interpretation of the  
32 data, edited the manuscript, and approved of the final manuscript. ZHW had full access to all the  
33 data in the study and had final responsibility for the decision to submit for publication.  
34  
35  
36

37 **Funding:** No funding  
38

39 **Competing interests:** All authors have completed the ICMJE uniform disclosure form at  
40 [www.icmje.org/coi\\_disclosure.pdf](http://www.icmje.org/coi_disclosure.pdf) and declare: no support from any organization for the  
41 submitted work.  
42  
43

44 **Data sharing:** Data are available upon reasonable request.  
45

46 The lead author affirms that this manuscript is an honest, accurate, and transparent account of  
47 the study being reported; that no important aspects of the study have been omitted; and that  
48 any discrepancies from the study as planned (and, if relevant, registered) have been explained.  
49  
50  
51  
52  
53  
54  
55  
56  
57  
58  
59  
60

1  
2  
3  
4  
5 **Figure Captions**  
6

7 **Figure 1:** Milestone events in the Central Hospital of Wuhan during the pandemic of  
8 COVID-19.  
9

10 **Figure 2:** Conceptual model of themes and relationships derived from healthcare  
11 workers' anxiety during different stages of the pandemic.  
12  
13  
14  
15  
16  
17  
18  
19  
20  
21  
22  
23  
24  
25  
26  
27  
28  
29  
30  
31  
32  
33  
34  
35  
36  
37  
38  
39  
40  
41  
42  
43  
44  
45  
46  
47  
48  
49  
50  
51  
52  
53  
54  
55  
56  
57  
58  
59  
60

For peer review only

**Table1: Demographic and Occupational Characteristics of interviewees.**

|                       |                    | Number |
|-----------------------|--------------------|--------|
| No. of interviewees   |                    | 53     |
| Gender                | Male               | 21     |
|                       | Female             | 32     |
| Mean age, years       | (range), years     | 23-63  |
| Infection by COVID-19 | Yes                | 18     |
|                       | No                 | 35     |
| Working position      | Front-line         | 40     |
|                       | Second-line        | 13     |
| Working life          | (range), years     | 1-32   |
| Occupation            | Physician          | 18     |
|                       | Nurse              | 24     |
|                       | Others in hospital | 11     |
| Marriage status       | Unmarried          | 33     |
|                       | Married            | 20     |
| Education background  | ≤Undergraduate     | 36     |
|                       | ≥Postgraduate      | 17     |

1  
2  
3  
4  
5  
6  
7  
8  
9  
10  
11  
12  
13  
14  
15  
16  
17  
18  
19  
20  
21  
22  
23  
24  
25  
26  
27  
28  
29  
30  
31  
32  
33  
34  
35  
36  
37  
38  
39  
40  
41  
42  
43  
44  
45  
46  
47  
48  
49  
50  
51  
52  
53  
54  
55  
56  
57  
58  
59  
60

| Theme      | Exemplary quotes                                                                                                                                                                                                                                                                                                                                                                                                                                                                                                                                                                                                                                |
|------------|-------------------------------------------------------------------------------------------------------------------------------------------------------------------------------------------------------------------------------------------------------------------------------------------------------------------------------------------------------------------------------------------------------------------------------------------------------------------------------------------------------------------------------------------------------------------------------------------------------------------------------------------------|
| Colleagues | <p>"Many colleagues are rushing to the front, so I have no reason to back down." -36</p> <p>"None in my family was infected, because a teacher in our department is very cautious. Before the New Year, when the epidemic was not exposed to the public, she already told me some precautions, such as keeping social distance and dining with public chopsticks." -48</p> <p>"When I was diagnosed as COVID-19 and hospitalized, there were still very few beds. The chief nurse reported my situation to the public health department and arranged a bed for me. Doctors and nurses were very kind, maybe because we worked together" -44</p> |
| Family     | <p>"Daily video with my family. I told them I am much better now and what medicine I used today. When I was dining outside the ward, I took down my mask and showed them that I was okay. In the later period, when I was about to be discharged from the hospital, they were completely relieved." -6</p> <p>"My deepest thought (when I was infected and hospitalized)? I have my wife and my family. I must live a very healthy life. I still look forward to living in this world." -7</p>                                                                                                                                                  |
| Friends    | <p>"I once collapsed. There were only three or five COVID-19 confirmed patients every day before. However, the number increased by tens of thousands those days, and I couldn't bear it. But I couldn't tell my mother because she would be more worried and sleepless. So I talked with my friends, which made me feel better." -3</p> <p>"When I was upset, I talked to my good friend and complained about something." -37</p>                                                                                                                                                                                                               |
| Patients   | <p>"The lady who lived beside my bed was kind to me. She was always comforting me. She said: 'Although I had a basic illness like diabetes, I am much better now. The effusion of my lungs is almost absorbed.' Her words made me feel much better. I was so lucky that she was always encouraging me and chatting with me." -41</p>                                                                                                                                                                                                                                                                                                            |
| Society    | <p>"I was isolated at home for two months. The government sent us supplies and relief" -29</p> <p>"The hospital helped us solve life problems as much as possible and gave us masks when we came to work every day. But few financial support." -32</p>                                                                                                                                                                                                                                                                                                                                                                                         |

## References:

- [1]. Wu, F., et al., A new coronavirus associated with human respiratory disease in China. *Nature*, 2020. 579(7798): p. 265-269.
- [2]. Johns Hopkins Coronavirus Resource Center. <https://coronavirus.jhu.edu/>.
- [3]. Pan, A., et al., Association of Public Health Interventions With the Epidemiology of the COVID-19 Outbreak in Wuhan, China. *JAMA*, 2020. 323(19): p. 1915.
- [4]. Kucharski, A.J., et al., Early dynamics of transmission and control of COVID-19: a mathematical modelling study. *The Lancet Infectious Diseases*, 2020. 20(5): p. 553-558.
- [5]. Wang, D., et al., Clinical Characteristics of 138 Hospitalized Patients With 2019 Novel Coronavirus - Infected Pneumonia in Wuhan, China. *JAMA*, 2020. 323(11): p. 1061.
- [6]. Lai, J., et al., Factors Associated With Mental Health Outcomes Among Health Care Workers Exposed to Coronavirus Disease 2019. *JAMA Network Open*, 2020. 3(3): p. e203976.
- [7]. Li, Z., et al., Vicarious traumatization in the general public, members, and non-members of medical teams aiding in COVID-19 control. *Brain, Behavior, and Immunity*, 2020.
- [8]. Xiao, H., et al., The Effects of Social Support on Sleep Quality of Medical Staff Treating Patients with Coronavirus Disease 2019 (COVID-19) in January and February 2020 in China. *Med Sci Monit*, 2020. 26: p. e923549.
- [9]. Halley, M.C., et al., Physician mothers' experience of workplace discrimination: a qualitative analysis. *BMJ*, 2018: p. k4926.
- [10]. Beverly, E.A., et al., Understanding Physicians' Challenges When Treating Type 2 Diabetic Patients' Social and Emotional Difficulties: A qualitative study. *Diabetes Care*, 2011. 34(5): p. 1086-1088.
- [11]. Hsieh, H. and S.E. Shannon, Three Approaches to Qualitative Content Analysis. *Qualitative Health Research*, 2016. 15(9): p. 1277-1288.
- [12]. Tong, A., P. Sainsbury and J. Craig, Consolidated criteria for reporting qualitative research (COREQ): a 32-item checklist for interviews and focus groups. *International Journal for Quality in Health Care*, 2007. 19(6): p. 349-357.
- [13]. Malterud, K., Qualitative research: standards, challenges, and guidelines. *The Lancet*, 2001. 358(9280): p. 483-488.
- [14]. Maher, L. and G. Dertadian, Qualitative research. *Addiction*, 2018. 113(1): p. 167-172.
- [15]. Treibel, T.A., et al., COVID-19: PCR screening of asymptomatic healthcare workers at London hospital. *The Lancet*, 2020. 395(10237): p. 1608-1610.
- [16]. Kisely, S., et al., Occurrence, prevention, and management of the psychological effects of

1  
2  
3 emerging virus outbreaks on healthcare workers: rapid review and meta-analysis. *BMJ*, 2020: p.  
4 m1642.

5  
6  
7 [17]. World Health Organization. Global surveillance for COVID-19 caused by human infection with  
8 COVID-19 virus.  
9 [https://www.who.int/publications/i/item/global-surveillance-for-covid-19-caused-by-human-infection-](https://www.who.int/publications/i/item/global-surveillance-for-covid-19-caused-by-human-infection-with-covid-19-virus-interim-guidance)  
10 [with-covid-19-virus-interim-guidance](https://www.who.int/publications/i/item/global-surveillance-for-covid-19-caused-by-human-infection-with-covid-19-virus-interim-guidance), 2020.

11  
12  
13 [18]. Xiao, H., et al., Social Capital and Sleep Quality in Individuals Who Self-Isolated for 14 Days  
14 During the Coronavirus Disease 2019 (COVID-19) Outbreak in January 2020 in China. *Medical*  
15 *Science Monitor*, 2020. 26.

16  
17  
18 [19]. World Health Organization. Social Stigma associated with COVID-19. A guide to preventing and  
19 addressing social stigma. World Health Organization.  
20 <https://www.who.int/docs/default-source/%20coronaviruse/covid19-stigma-guide.pdf>, 2020.

21  
22  
23 [20]. Peel, J.K., C.M. Schlachta and N.A. Alkhamesi, A systematic review of the factors affecting  
24 choice of surgery as a career. *Can J Surg*, 2018. 61(1): p. 58-67.

25  
26  
27 [21]. Kodama, S., et al., Cardiorespiratory Fitness as a Quantitative Predictor of All-Cause Mortality  
28 and Cardiovascular Events in Healthy Men and Women: A Meta-analysis. *JAMA*, 2009. 301(19): p.  
29 2024-2035.

30  
31  
32 [22]. Eftekhari Ardebili, M., et al., Healthcare providers experience of working during the COVID-19  
33 pandemic: A qualitative study. *American Journal of Infection Control*, 2020.

34  
35  
36 [23]. Liu, Q., et al., The experiences of healthcare providers during the COVID-19 crisis in China: a  
37 qualitative study. *The Lancet Global Health*, 2020. 8(6): p. e790-e798.

38  
39  
40 [24]. Xu, Z., et al., Primary Care Practitioners' Barriers to and Experience of COVID-19 Epidemic  
41 Control in China: a Qualitative Study. *J Gen Intern Med*, 2020. 35(11): p. 3278-3284.

42  
43  
44 [25]. Sun, N., et al., A qualitative study on the psychological experience of caregivers of COVID-19  
45 patients. *American Journal of Infection Control*, 2020. 48(6): p. 592-598.

46  
47  
48 [26]. Zhang, M.M., et al., Nurses' psychological changes and coping strategies during home isolation  
49 for the 2019 novel coronavirus in China: A qualitative study. *Journal of Advanced Nursing*, 2021.  
50 77(1): p. 308-317.

51  
52  
53 [27]. Williams, S.N., et al., Public perceptions and experiences of social distancing and social isolation  
54 during the COVID-19 pandemic: a UK-based focus group study. *BMJ Open*, 2020. 10(7): p. e039334.

55  
56  
57 [28]. Fan, J., et al., A qualitative study of the vocational and psychological perceptions and issues of  
58 transdisciplinary nurses during the COVID-19 outbreak. *Aging (Albany, NY.)*, 2020. 12(13): p.  
59 12479-12492.

60  
61 [29]. Lehto, R.H. and K.F. Stein, Death anxiety: an analysis of an evolving concept. *Res Theory Nurs*  
62 *Pract*, 2009. 23(1): p. 23-41.



1  
2  
3  
4 [30]. Draper, E.J., et al., Relationship between physicians' death anxiety and medical communication  
5 and decision-making: A systematic review. *Patient Education and Counseling*, 2019. 102(2): p.  
6 266-274.  
7

8 [31]. Wang, C., et al., A novel coronavirus outbreak of global health concern. *Lancet*, 2020.  
9 395(10223): p. 470-473.  
10  
11  
12  
13  
14  
15  
16  
17  
18  
19  
20  
21  
22  
23  
24  
25  
26  
27  
28  
29  
30  
31  
32  
33  
34  
35  
36  
37  
38  
39  
40  
41  
42  
43  
44  
45  
46  
47  
48  
49  
50  
51  
52  
53  
54  
55  
56  
57  
58  
59  
60

For peer review only

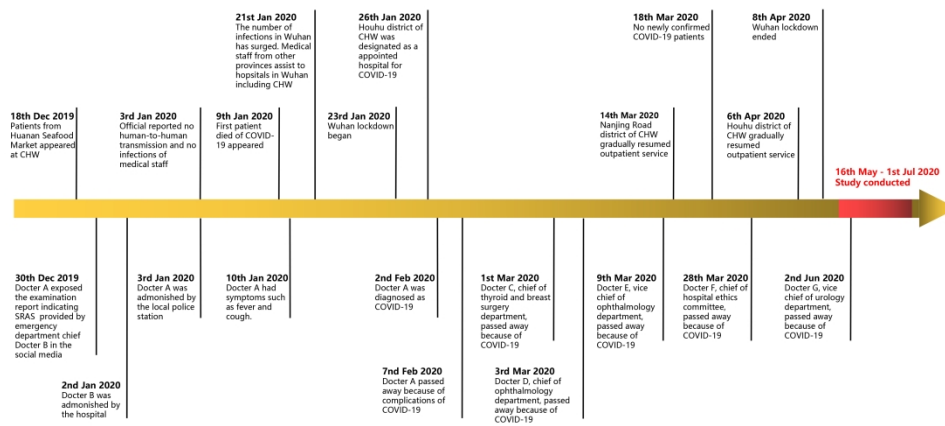

Milestone events in the Central Hospital of Wuhan during the epidemic of COVID-19.

399x190mm (300 x 300 DPI)

1  
2  
3  
4  
5  
6  
7  
8  
9  
10  
11  
12  
13  
14  
15  
16  
17  
18  
19  
20  
21  
22  
23  
24  
25  
26  
27  
28  
29  
30  
31  
32  
33  
34  
35  
36  
37  
38  
39  
40  
41  
42  
43  
44  
45  
46  
47  
48  
49  
50  
51  
52  
53  
54  
55  
56  
57  
58  
59  
60



Conceptual model of themes and relationships derived from healthcare workers' anxiety during different stages of epidemics.

## Interview Guideline

### Basic information:

Age, Gender, Marriage status, Education level, Department, Working life, Occupation, Education background, COVID-19 infection history, Working position during epidemics

### Key points at the beginning of the interview:

1. Thank you for participating in this research
2. This interview will be recorded and transcribed verbatim
3. Personal information will be kept confidential, and part of the interview will be used to publish.

### The main content of the interview (for non-infected participants):

1. How did you feel at the beginning of the epidemic? When did you begin to realize the severity of the epidemic? How did you understand these? Could you talk about your inner thoughts when you heard that other colleagues in our hospital were infected? Why did you have these feelings?
2. (for front-line participants) When were you transferred to another department (for treating COVID-19 patients)? How long? Working position? Emotional reaction when you heard this news for the first time? Emotion change during this period? Why was there such a change? What were your more impressive experiences?
3. (for second-line participants) What were your main tasks during the epidemic? Emotion change during this period? Why was there such a change? What were your more impressive experiences?
4. Were you afraid during the epidemic? Why? Did you have depression or insomnia during this period? If so, to what extent? What supports you until now? How did you adjust yourselves? What intervention measures did the hospital provide correspondingly (such as classes, supplies, etc.)?
5. Were you worried about your family during this period? How to balance work and family? What troubles has this epidemic brought to your family and life, and how did you deal with

1  
2  
3 it?  
4

- 5  
6 6. How did you feel when you heard the sad news of the death of several doctors in our  
7 hospital? Will there be self-doubt or even questioning this job? why?  
8  
9  
10 7. Now that the epidemic has been controlled effectively, how do you feel? why? Have there  
11 been any changes in life attitudes after experiencing the epidemic? New understanding of  
12 this job? Have you ever thought of resigning? Why? If so, is there still such an idea now?  
13 What made you change your mind/what idea made you choose to persist?  
14  
15  
16 8. Do you have anything else to say? Regarding this epidemic, can you share with some  
17 suggestions based on your own experience?  
18  
19  
20 9. What are your expectations for the future?  
21  
22  
23  
24

25 **The main content of the interview (for infected participants):**

- 26  
27 1. How did you feel at the beginning of the epidemic? When did you begin to realize the  
28 severity of the epidemic? How did you understand these?  
29  
30  
31 2. When did the symptoms appear? What was your inner thought at the time? When were you  
32 diagnosed with COVID-19? Feelings after the diagnosis? What is the inner change from  
33 symptom to diagnosis?  
34  
35  
36 3. How did you feel during the treatment? Did you have depression or insomnia during this  
37 period? If so, to what extent? What supports you until now? How did you adjust yourselves?  
38 What intervention measures did the hospital provide correspondingly?  
39  
40  
41 4. Had your family been infected? If so, what is their situation? How did you maintain contact  
42 during this time? They must be very worried about you, how did you deal with it?  
43  
44  
45 5. How did you feel when you heard the sad news of the death of several doctors in our  
46 hospital? Will there be self-doubt or even questioning this job? why?  
47  
48  
49 6. You have recovered, resumed work, and returned to your position now. Have there been any  
50 changes in life attitudes after experiencing the epidemic? New understanding of this job?  
51 Have you ever thought of resigning? Why? If so, is there still such an idea now? What made  
52 you change your mind/what idea made you choose to persist?  
53  
54  
55  
56 7. Do you have anything else to say? Regarding this epidemic, can you share with some  
57 suggestions based on your own experience?  
58  
59  
60 8. What are your expectations for the future?

**Interview requirements:**

1. In-depth and sincere conversations. No simple questions and answers, but the interviewer actively grasps the true psychological feelings of the interviewee, and specifically understands his/her situation during COVID-19 epidemics, such as anxiety, fear, doubt, or luck, pride, and excitement. Talk like an old friend and increase the closeness of the interviewee.
2. Participants are not necessarily willing to admit true feelings. They may not be embarrassed to say that they are particularly scared during the epidemic, but the interviewer can slowly get in touch with their true thoughts through many indirect questions: "What did you think when \*\*\* were diagnosed with COVID-19?" "Have you ever suspected that you have been infected with SARS-COV-19?". As the interview proceeds, it is normal for the interviewee to have inconsistent remarks.
3. This interview is semi-structured, which means that the main content must be covered, but the way of asking can not be restricted to a fixed format
4. Mainly focus on personal inner emotional experience, do not involve some politically sensitive topics.

## Consolidated criteria for reporting qualitative studies (COREQ): 32-item checklist

| No                                                 | Item                    | Guide questions/description                                 | Page No. | Relevant text from manuscript                                |
|----------------------------------------------------|-------------------------|-------------------------------------------------------------|----------|--------------------------------------------------------------|
| <b>Domain 1:<br/>Research team and reflexivity</b> |                         |                                                             |          |                                                              |
| Personal Characteristics                           |                         |                                                             |          |                                                              |
| 1.                                                 | Interviewer/facilitator | Which author/s conducted the interview or focus group?      | 12       | MLF, BX, TT and YH collected data.                           |
| 2.                                                 | Credentials             | What were the researcher's credentials? <i>E.g. PhD, MD</i> | 1        |                                                              |
| 3.                                                 | Occupation              | What was their occupation at the time of the study?         | 1        |                                                              |
| 4.                                                 | Gender                  | Was the researcher male or female?                          | 1        |                                                              |
| 5.                                                 | Experience and          | What experience or training did the                         | 4,5      | The data was analyzed by a team of three trained qualitative |

| No | Item                                     | Guide questions/description                                                                                     | Page No. | Relevant text from manuscript                                                                                                                                                                                                                                                                                                                                                                                                                                                                                    |
|----|------------------------------------------|-----------------------------------------------------------------------------------------------------------------|----------|------------------------------------------------------------------------------------------------------------------------------------------------------------------------------------------------------------------------------------------------------------------------------------------------------------------------------------------------------------------------------------------------------------------------------------------------------------------------------------------------------------------|
|    | training                                 | researcher have?                                                                                                |          | <p>researchers based on a qualitative content analysis method. In addition, all excerpts from interviews in this paper were translated from Chinese by investigators and native English speakers cooperatively to convey the interviewees' semantics completely.</p> <p>The interview guide included questions regarding the experience of living and working during epidemics was designed with the help of professional qualitative researchers and distributed to interviewers with associated experience</p> |
|    | Relationship with participants           |                                                                                                                 |          |                                                                                                                                                                                                                                                                                                                                                                                                                                                                                                                  |
| 6. | Relationship established                 | Was a relationship established prior to study commencement?                                                     | 4        | No relationship                                                                                                                                                                                                                                                                                                                                                                                                                                                                                                  |
| 7. | Participant knowledge of the interviewer | What did the participants know about the researcher? <i>e.g. personal goals, reasons for doing the research</i> | 4        | Nothing                                                                                                                                                                                                                                                                                                                                                                                                                                                                                                          |
| 8. | Interviewer                              | What characteristics were reported                                                                              | 4        | The interview guide included questions regarding the experience                                                                                                                                                                                                                                                                                                                                                                                                                                                  |



| No                                | Item                                  | Guide questions/description                                                                                                                                     | Page No. | Relevant text from manuscript                                                                                                                                                                      |
|-----------------------------------|---------------------------------------|-----------------------------------------------------------------------------------------------------------------------------------------------------------------|----------|----------------------------------------------------------------------------------------------------------------------------------------------------------------------------------------------------|
|                                   | characteristics                       | about the interviewer/facilitator?<br>e.g. <i>Bias, assumptions, reasons and interests in the research topic</i>                                                |          | of living and working during epidemics was designed with the help of professional qualitative researchers and distributed to interviewers with associated experience                               |
| <b>Domain 2:<br/>study design</b> |                                       |                                                                                                                                                                 |          |                                                                                                                                                                                                    |
| Theoretical framework             |                                       |                                                                                                                                                                 |          |                                                                                                                                                                                                    |
| 9.                                | Methodological orientation and Theory | What methodological orientation was stated to underpin the study? <i>e.g. grounded theory, discourse analysis, ethnography, phenomenology, content analysis</i> | 4        | The data was analyzed by a team of three trained qualitative researchers based on a qualitative content analysis method                                                                            |
| Participant selection             |                                       |                                                                                                                                                                 |          |                                                                                                                                                                                                    |
| 10.                               | Sampling                              | How were participants selected? <i>e.g. purposive, convenience, consecutive, snowball</i>                                                                       | 4        | participants were selected through purposeful maximum variation sampling regarding age, sex, occupation, and working position for patients to accomplish full coverage. The number of participants |

| No      | Item                       | Guide questions/description                                                           | Page No. | Relevant text from manuscript                                                                                                                                                                                                                          |
|---------|----------------------------|---------------------------------------------------------------------------------------|----------|--------------------------------------------------------------------------------------------------------------------------------------------------------------------------------------------------------------------------------------------------------|
|         |                            |                                                                                       |          | was determined based on "saturation", a sense of closure that occurs when data collection ceases to provide important new information and when patterns in the data become evident.                                                                    |
| 11.     | Method of approach         | How were participants approached?<br><i>e.g. face-to-face, telephone, mail, email</i> | 4        | Data were gathered by semistructured interviews mostly through phone or internet communication tools such as Wechat and QQ due to social distancing.                                                                                                   |
| 12.     | Sample size                | How many participants were in the study?                                              | 5        | Altogether, 53 healthcare workers were interviewed.                                                                                                                                                                                                    |
| 13.     | Non-participation          | How many people refused to participate or dropped out? Reasons?                       | 4        | In total, 53 healthcare workers completed the full survey, with a participation rate of 53/76 (69.7%) based on the total number of individuals whom we invited to interview. All participants who accepted our invitation finished the full interview. |
| Setting |                            |                                                                                       |          |                                                                                                                                                                                                                                                        |
| 14.     | Setting of data collection | Where was the data collected? <i>e.g. home, clinic, workplace</i>                     | 4        | Data were gathered by semistructured interviews mostly through phone or internet communication tools such as Wechat and QQ due to social distancing.                                                                                                   |

| No              | Item                         | Guide questions/description                                                              | Page No. | Relevant text from manuscript                                                                                                                                                                                                                                                                                                                                                                                                                                                                        |
|-----------------|------------------------------|------------------------------------------------------------------------------------------|----------|------------------------------------------------------------------------------------------------------------------------------------------------------------------------------------------------------------------------------------------------------------------------------------------------------------------------------------------------------------------------------------------------------------------------------------------------------------------------------------------------------|
| 15.             | Presence of non-participants | Was anyone else present besides the participants and researchers?                        | 4        | none                                                                                                                                                                                                                                                                                                                                                                                                                                                                                                 |
| 16.             | Description of sample        | What are the important characteristics of the sample? <i>e.g. demographic data, date</i> | 4        | Demographic data included age, gender, departments, professional titles, educational background, marriage status, occupation, occupation, working life, and COVID-19 infection history were collected.                                                                                                                                                                                                                                                                                               |
| Data collection |                              |                                                                                          |          |                                                                                                                                                                                                                                                                                                                                                                                                                                                                                                      |
| 17.             | Interview guide              | Were questions, prompts, guides provided by the authors? Was it pilot tested?            | 4        | The interview guide included questions regarding the experience of living and working during epidemics was designed with the help of professional qualitative researchers and distributed to interviewers with associated experience (Supplementary file 1). Examples of initial questions were: "What did you experience during the epidemic?", "How did you feel when you heard of your colleagues' death?", "Has something changed after epidemic?". When needed, follow-up questions were posed. |
| 18.             | Repeat interviews            | Were repeat interviews carried out? If yes, how many?                                    | 4        | Six interviews were repeated for more than one time to clarify critical questions.                                                                                                                                                                                                                                                                                                                                                                                                                   |

| No                                              | Item                   | Guide questions/description                                              | Page No. | Relevant text from manuscript                                                                                                                                                               |
|-------------------------------------------------|------------------------|--------------------------------------------------------------------------|----------|---------------------------------------------------------------------------------------------------------------------------------------------------------------------------------------------|
| 19.                                             | Audio/visual recording | Did the research use audio or visual recording to collect the data?      | 4        | All interview audio was recorded and transcribed verbatim with participants' permission, after which interview transcripts were sent to participants via email for comments or corrections  |
| 20.                                             | Field notes            | Were field notes made during and/or after the interview or focus group?  | 4        | No                                                                                                                                                                                          |
| 21.                                             | Duration               | What was the duration of the interviews or focus group?                  | 4        | The interviews were carried out by at least one interviewers and lasted for 10–60 minutes.                                                                                                  |
| 22.                                             | Data saturation        | Was data saturation discussed?                                           | 4        | During the study, saturation was achieved after 38 interviews. To accomplish maximum variation, interviews continue with further patients to ensure that no new aspects emerged.            |
| 23.                                             | Transcripts returned   | Were transcripts returned to participants for comment and/or correction? | 4        | All interview audio was recorded and transcribed verbatim with participants' permission, after which interview transcripts were sent to participants via email for comments or corrections. |
| <b>Domain 3:<br/>analysis and<br/>findingsz</b> |                        |                                                                          |          |                                                                                                                                                                                             |

| No            | Item                           | Guide questions/description                                 | Page No. | Relevant text from manuscript                                                                                                                                                                          |
|---------------|--------------------------------|-------------------------------------------------------------|----------|--------------------------------------------------------------------------------------------------------------------------------------------------------------------------------------------------------|
| Data analysis |                                |                                                             |          |                                                                                                                                                                                                        |
| 24.           | Number of data coders          | How many data coders coded the data?                        | 4        | The data was analyzed by a team of three trained qualitative researchers based on a qualitative content analysis method                                                                                |
| 25.           | Description of the coding tree | Did authors provide a description of the coding tree?       | 4        | The team developed a structured codebook that included inductively derived codes that represented ideas that emerged from the data as well as deductively selected categories to organize the dataset. |
| 26.           | Derivation of themes           | Were themes identified in advance or derived from the data? | 5        | No. each cluster's statements were scrutinized and compared to find the central component and then fused into categories (theme).                                                                      |
| 27.           | Software                       | What software, if applicable, was used to manage the data?  | 4        | No                                                                                                                                                                                                     |
| 28.           | Participant checking           | Did participants provide feedback on the findings?          | 5        | Yes                                                                                                                                                                                                    |
| Reporting     |                                |                                                             |          |                                                                                                                                                                                                        |

| No  | Item                         | Guide questions/description                                                                                                                 | Page No. | Relevant text from manuscript                                                                                                                                                                                                                 |
|-----|------------------------------|---------------------------------------------------------------------------------------------------------------------------------------------|----------|-----------------------------------------------------------------------------------------------------------------------------------------------------------------------------------------------------------------------------------------------|
| 29. | Quotations presented         | Were participant quotations presented to illustrate the themes / findings?<br>Was each quotation identified? e.g. <i>participant number</i> | 5-10     | "Results" section                                                                                                                                                                                                                             |
| 30. | Data and findings consistent | Was there consistency between the data presented and the findings?                                                                          | 5-10     | "Results" section                                                                                                                                                                                                                             |
| 31. | Clarity of major themes      | Were major themes clearly presented in the findings?                                                                                        | 5        | The issues and connections are extracted from all interview data and summarized in the conceptual model, which was composed of healthcare workers' anxiety during different stages of epidemics and related drivers and mediators (Figure 2). |
| 32. | Clarity of minor themes      | Is there a description of diverse cases or discussion of minor themes?                                                                      | 5-10     | "Results" section                                                                                                                                                                                                                             |
