# Supplementary material for: Drivers and mediators of healthcare workers’ anxiety in one of the most affected hospitals by COVID-19: a qualitative analysis
Source: PubMed Central journal article supplement — BMJ Open. 2021 Mar 5;11(3):e045048. doi: 10.1136/bmjopen-2020-045048 (PMC7938469; doi:10.1136/bmjopen-2020-045048), 2021-03-05
Supplement: bmjopen-2020-045048supp001.pdf [file bmjopen-2020-045048supp001.pdf]

## Interview Guideline

### Basic information:

Age, Gender, Marriage status, Education level, Department, Working life, Occupation, Education background, COVID-19 infection history, Working position during epidemics

### Key points at the beginning of the interview:

1. Thank you for participating in this research
2. This interview will be recorded and transcribed verbatim
3. Personal information will be kept confidential, and part of the interview will be used to publish.

### The main content of the interview (for non-infected participants):

1. How did you feel at the beginning of the epidemic? When did you begin to realize the severity of the epidemic? How did you understand these? Could you talk about your inner thoughts when you heard that other colleagues in our hospital were infected? Why did you have these feelings?
2. (for front-line participants) When were you transferred to another department (for treating COVID-19 patients)? How long? Working position? Emotional reaction when you heard this news for the first time? Emotion change during this period? Why was there such a change? What were your more impressive experiences?
3. (for second-line participants) What were your main tasks during the epidemic? Emotion change during this period? Why was there such a change? What were your more impressive experiences?
4. Were you afraid during the epidemic? Why? Did you have depression or insomnia during this period? If so, to what extent? What supports you until now? How did you adjust yourselves? What intervention measures did the hospital provide correspondingly (such as classes, supplies, etc.)?
5. Were you worried about your family during this period? How to balance work and family? What troubles has this epidemic brought to your family and life, and how did you deal with

it?

6. How did you feel when you heard the sad news of the death of several doctors in our hospital? Will there be self-doubt or even questioning this job? why?
7. Now that the epidemic has been controlled effectively, how do you feel? why? Have there been any changes in life attitudes after experiencing the epidemic? New understanding of this job? Have you ever thought of resigning? Why? If so, is there still such an idea now? What made you change your mind/what idea made you choose to persist?
8. Do you have anything else to say? Regarding this epidemic, can you share with some suggestions based on your own experience?
9. What are your expectations for the future?

**The main content of the interview (for infected participants):**

1. How did you feel at the beginning of the epidemic? When did you begin to realize the severity of the epidemic? How did you understand these?
2. When did the symptoms appear? What was your inner thought at the time? When were you diagnosed with COVID-19? Feelings after the diagnosis? What is the inner change from symptom to diagnosis?
3. How did you feel during the treatment? Did you have depression or insomnia during this period? If so, to what extent? What supports you until now? How did you adjust yourselves? What intervention measures did the hospital provide correspondingly?
4. Had your family been infected? If so, what is their situation? How did you maintain contact during this time? They must be very worried about you, how did you deal with it?
5. How did you feel when you heard the sad news of the death of several doctors in our hospital? Will there be self-doubt or even questioning this job? why?
6. You have recovered, resumed work, and returned to your position now. Have there been any changes in life attitudes after experiencing the epidemic? New understanding of this job? Have you ever thought of resigning? Why? If so, is there still such an idea now? What made you change your mind/what idea made you choose to persist?
7. Do you have anything else to say? Regarding this epidemic, can you share with some suggestions based on your own experience?
8. What are your expectations for the future?

**Interview requirements:**

1. In-depth and sincere conversations. No simple questions and answers, but the interviewer actively grasps the true psychological feelings of the interviewee, and specifically understands his/her situation during COVID-19 epidemics, such as anxiety, fear, doubt, or luck, pride, and excitement. Talk like an old friend and increase the closeness of the interviewee.
2. Participants are not necessarily willing to admit true feelings. They may not be embarrassed to say that they are particularly scared during the epidemic, but the interviewer can slowly get in touch with their true thoughts through many indirect questions: "What did you think when \*\*\* were diagnosed with COVID-19?" "Have you ever suspected that you have been infected with SARS-COV-19?". As the interview proceeds, it is normal for the interviewee to have inconsistent remarks.
3. This interview is semi-structured, which means that the main content must be covered, but the way of asking can not be restricted to a fixed format
4. Mainly focus on personal inner emotional experience, do not involve some politically sensitive topics.
